# Supplementary material for: Characteristics, sources and reactions of nitrous acid during winter in the core city of the Central Plains Economic Region in China via high-time-resolution online measurements
Source: Copernicus journal article supplement (doi:10.5194/acp-2019-916), 2019-10-29

---

## Itemized Response to Anonymous Referee #1's Comments

**Ms. Ref. No.:** acp-2019-916

**Title:** Characteristics, sources, and reactions of nitrous acid during winter at an urban site in the Central Plains Economic Region in China

### **Response to Anonymous Referee #1:**

We have carefully addressed your comments on our manuscript and made necessary revisions of the previous manuscript. We sincerely thank you for valuable and constructive inputs. We believe that we have adequately addressed all of your comments and thus the current version has been greatly improved with those valuable comments and further English editing. The revised phrases/sentences/paragraphs are shown in the line number of the revised text.

The followings are our itemized replies to your comments.

#### General comments:

1. In general, the text can be followed. However, there are many awkward, unclear, redundant, unnecessary, ambiguous, and confusing phrases/statements (see the following tech/English comments). A professional expert must edit the text for clarity and for better flow before resubmission.

Response: We sent the manuscript to a professional expert to enhance the readability of the manuscript. The revised portion has been highlighted with yellow color in the revised version (see the response of the following tech/English comments).

2. The rationale for your study is weak – need more elaboration. The fact that no study has been performed in Zhengzhou (L 129) does not justify the novelty of your study. You should have covered the setbacks of previous studies and state those tasks (including tables/figures) currently evaluated have not been properly addressed in previous studies. Unfortunately, I have found none. Anyway, pls emphasize the

---

uniqueness of your study.

Response: For your comment, we add the sentences in the revised text.

L 134-147: Many papers (Huang et al., 2017; Tong et al., 2016) took PM<sub>2.5</sub> as the main control factor of HONO, and studied the differences of HONO sources and characteristics between clean and polluted periods. Homogeneous reaction, direct emission, heterogeneous reaction, and daytime budget analysis were conducted during the period of worsening pollution (namely HD period in this paper). Total NO<sub>x</sub> emissions in cities with different leading factors of emissions have been declining year by year due to Chinese government emission control measures, but some Chinese cities are still in high-NO<sub>x</sub> areas (e.g. Beijing, Shanghai, Guangzhou, and Zhengzhou.) (Kim et al., 2015; Liu et al., 2017). Under high-NO<sub>x</sub> conditions, some papers (Cui et al., 2018; Hou et al., 2016) suggested that heterogeneous reaction was the main source of HONO and did not conduct a quantitative analysis of homogeneous reaction, especially in winter. So, we explore relevant studies of homogeneous reactions. In addition, the source contributions of HONO at night varied with the degree of pollution level were not explained.

3. I have a hard time figuring out that the results from one single sampling site located on the rooftop of a building in Zhengzhou university (L 134) can represent the air quality in general and HONO in particular in the entire Zhengzhou city (180 million population, L 106). This is why there are so many monitoring stations (traffic, urban and background) within a given large city to reflect the air quality within the city. Pls modify your title as well those in the text.

Response: Thank you for your comment. As you say, one single sampling site cannot represent the air quality in general and HONO in the entire Zhengzhou city. We have revised the title, “Characteristics, sources, and reactions of nitrous acid during winter at an urban site in the Central Plains Economic Region in China”.

---

4. Need to clearly cover HONO sources and sinks as well as homogeneous ( $\text{NO} + \bullet\text{OH}$ ) and heterogeneous ( $\text{NO}_2 + \text{H}_2\text{O}$ ) in the text (introduction and discussion). For example, the role of ground surface at night for HONO deposit (sink) and the reemission (source) from HONO reservoirs (e.g., soil nitrite), etc. The other sink source, albeit insignificant, is that HONO may react with others to form new compounds, as in the case of reactions with amines in forming nitrosamines. How about transport of HONO? – what is the lifetime in atmosphere (hours under in-door conditions).

Response: OK. We added the sentence in the introduction in the revised text.

L 51-54: Therefore, the changes in the contribution of the homogeneous reaction, heterogeneous conversion, and direct emission during pollution can be observed by studying the formation mechanism of HONO.

In the discussion, we thought that the contribution of soot surface to HONO production is usually much lower than expected because the uptake efficiency of  $\text{NO}_2$  decreases with the prolonged reaction time caused by surface deactivation. The aerosol surface is an important medium for the heterogeneous transformation from  $\text{NO}_2$  to HONO (Liu et al., 2014). So, we added the sentences in the revised text.

L 364-368: the contribution of soot surface to HONO production is usually much lower than expected because the uptake efficiency of  $\text{NO}_2$  decreases with the prolonged reaction time caused by surface deactivation. The aerosol surface is an important medium for the heterogeneous transformation from  $\text{NO}_2$  to HONO (Liu et al., 2014).

We have clearly known that other HONO sources are not the main HONO sources and sinks: 1. HONO is formed by  $\text{NO}_2$  through the photolysis of sooty surface and adsorbed nitric acid and nitrate at UV wavelengths (Kleffmann et al., 1999). 2. The homogeneous nucleation of  $\text{NO}_2$ ,  $\text{H}_2\text{O}$ , and  $\text{NH}_3$  is the HONO formation pathway (Zhang and Tao, 2010). 3. HONO can deposit and react with amines in forming nitrosamines (Li et al., 2012). So, we added the sentences in the revised

---

text.

L 98-102: The unknown sources of HONO may include the NO<sub>2</sub> photolysis of sooty surface and adsorbed nitric acid and nitrate at UV wavelengths (Kleffmann et al., 1999). The homogeneous nucleation of NO<sub>2</sub>, H<sub>2</sub>O, and NH<sub>3</sub> is the HONO formation pathway (Zhang and Tao, 2010). In the meanwhile, HONO can deposit and react with amines in forming nitrosamines (Li et al., 2012) for sinking.

We knew that the lifetime of HONO was 10–20 min at daytime (Lu et al., 2018) and the estimated lifetime was about 3.3 h in the nighttime (Nie et al., 2015).

5. Need to discuss the uncertainty in your results due to variations of many parameters (e.g., rate constants and OH radical values, L 250-253). This leads to the following comments about the use of significant figures.

Response: Measured species and performance of the instruments are counted in **Table S1**. The rate constants are learned from the study (Atkinson et al., 2004).

We don't know the uncertainty of rate constants.

**Table S1.**

Measured species and performance of the instruments.

| Species           | Measurement technique                    | Detection limit        | Accuracy |
|-------------------|------------------------------------------|------------------------|----------|
| PM <sub>2.5</sub> | Tapered Element Oscillating Microbalance | 1.5 µg m <sup>-3</sup> | ± 5%     |
| HONO              | Ion Chromatography                       | 4 pptv                 | ± 20%    |
| CO                | Absorbs Infrared Radiation               | 40 ppbv                | ± 5%     |
| NO                | Chemiluminescence                        | 60 pptv                | ± 20%    |
| NO <sub>2</sub>   | Chemiluminescence                        | 300 pptv               | ± 20%    |
| O <sub>3</sub>    | UV Photometry                            | 0.5 ppbv               | ± 5%     |

The results came from instrument manufacturers.

Hence, we assumed ± 50% ·OH values to estimate the uncertainty of P<sub>OH+NO</sub><sup>net</sup>.

The ·OH values of 1.25×10<sup>5</sup> and 3.75×10<sup>5</sup> molecule cm<sup>-3</sup> were calculated the

P<sub>OH+NO</sub><sup>net</sup> values of 0.16 and 0.49 ppbv h<sup>-1</sup>.

L 295-297: We assumed  $\pm 50\%$   $\cdot\text{OH}$  values to estimate the uncertainty of  $P_{\text{OH}+\text{NO}}^{\text{net}}$ . The  $\cdot\text{OH}$  values of  $1.25 \times 10^5$  and  $3.75 \times 10^5$  molecule  $\text{cm}^{-3}$  were calculated the  $P_{\text{OH}+\text{NO}}^{\text{net}}$  values of 0.16 and 0.49 ppbv  $\text{h}^{-1}$ .

6. Be careful about use of significant figures. Delete decimal points for RH (L 182, 185, 187, 194, Table 2, etc.), for NO<sub>2</sub> level (L 197-198; also, you compare with standard of 80), for PM<sub>2.5</sub> (Table 2), for level in  $\mu\text{g m}^{-3}$  (L 198, etc.), for ratio (L 34, 304, etc.).

Response: Thank you for the comment. We modified the problem in **Table 1** and revised the text. We have learned how to use significant figures.

**Table 1.**

Data statistics of HONO, PM<sub>2.5</sub>, NO<sub>2</sub>, NO, NO<sub>x</sub>, HONO/NO<sub>2</sub>, HONO/NO<sub>x</sub>, O<sub>3</sub>, CO, T, RH, and WS during the measurement period, mean value  $\pm$  standard deviation.

| Trace gases <sup>↵</sup>                                                | ·CD <sup>↵</sup>         |                          |                          | ·PD <sup>↵</sup>         |                          |                          | ·SPD <sup>↵</sup>        |                          |                          | Total days <sup>↵</sup>  |
|-------------------------------------------------------------------------|--------------------------|--------------------------|--------------------------|--------------------------|--------------------------|--------------------------|--------------------------|--------------------------|--------------------------|--------------------------|
|                                                                         | Day <sup>↵</sup>         | Night <sup>↵</sup>       | All <sup>↵</sup>         | Day <sup>↵</sup>         | Night <sup>↵</sup>       | All <sup>↵</sup>         | Day <sup>↵</sup>         | Night <sup>↵</sup>       | All <sup>↵</sup>         |                          |
| PM <sub>2.5</sub> <sup>↵</sup><br>( $\mu\text{g m}^{-3}$ ) <sup>↵</sup> | 37 ± 15 <sup>↵</sup>     | 41 ± 17 <sup>↵</sup>     | 39 ± 16 <sup>↵</sup>     | 80 ± 32 <sup>↵</sup>     | 93 ± 46 <sup>↵</sup>     | 87 ± 40 <sup>↵</sup>     | 148 ± 29 <sup>↵</sup>    | 147 ± 33 <sup>↵</sup>    | 147 ± 31 <sup>↵</sup>    | 91 ± 54 <sup>↵</sup>     |
| HONO <sup>↵</sup><br>(ppbv) <sup>↵</sup>                                | 0.9 ± 0.7 <sup>↵</sup>   | 1.4 ± 0.7 <sup>↵</sup>   | 1.1 ± 0.7 <sup>↵</sup>   | 1.9 ± 1.7 <sup>↵</sup>   | 2.7 ± 1.3 <sup>↵</sup>   | 2.3 ± 1.5 <sup>↵</sup>   | 3.5 ± 2.7 <sup>↵</sup>   | 4.0 ± 1.1 <sup>↵</sup>   | 3.7 ± 2.1 <sup>↵</sup>   | 2.5 ± 1.9 <sup>↵</sup>   |
| CO <sup>↵</sup><br>(ppmv) <sup>↵</sup>                                  | 1 ± 0.3 <sup>↵</sup>     | 1 ± 0.3 <sup>↵</sup>     | 1 ± 0.3 <sup>↵</sup>     | 1 ± 0.4 <sup>↵</sup>     | 1 ± 0.6 <sup>↵</sup>     | 1 ± 0.5 <sup>↵</sup>     | 2 ± 0.6 <sup>↵</sup>     | 2 ± 0.4 <sup>↵</sup>     | 2 ± 0.5 <sup>↵</sup>     | 1 ± 0.6 <sup>↵</sup>     |
| NO <sup>↵</sup><br>(ppbv) <sup>↵</sup>                                  | 18.4 ± 39.3 <sup>↵</sup> | 15 ± 34.3 <sup>↵</sup>   | 16.7 ± 36.8 <sup>↵</sup> | 20.3 ± 26.2 <sup>↵</sup> | 30.7 ± 33.6 <sup>↵</sup> | 25.5 ± 30.4 <sup>↵</sup> | 40.8 ± 50.8 <sup>↵</sup> | 64.3 ± 82.1 <sup>↵</sup> | 52.5 ± 68.9 <sup>↵</sup> | 31.8 ± 51.4 <sup>↵</sup> |
| NO <sub>2</sub> <sup>↵</sup><br>(ppbv) <sup>↵</sup>                     | 23 ± 13 <sup>↵</sup>     | 26 ± 13 <sup>↵</sup>     | 25 ± 13 <sup>↵</sup>     | 29 ± 9 <sup>↵</sup>      | 38 ± 10 <sup>↵</sup>     | 33 ± 11 <sup>↵</sup>     | 40 ± 11 <sup>↵</sup>     | 43 ± 10 <sup>↵</sup>     | 42 ± 11 <sup>↵</sup>     | 33 ± 14 <sup>↵</sup>     |
| O <sub>3</sub> <sup>↵</sup><br>(ppbv) <sup>↵</sup>                      | 21.4 ± 11.5 <sup>↵</sup> | 13.8 ± 10.0 <sup>↵</sup> | 17.6 ± 11.4 <sup>↵</sup> | 17.4 ± 11.9 <sup>↵</sup> | 8.9 ± 8.1 <sup>↵</sup>   | 13.1 ± 10.9 <sup>↵</sup> | 15.6 ± 14.2 <sup>↵</sup> | 7.9 ± 7.1 <sup>↵</sup>   | 11.8 ± 11.8 <sup>↵</sup> | 14.2 ± 11.7 <sup>↵</sup> |
| HONO/NO <sub>2</sub> <sup>↵</sup><br>(%) <sup>↵</sup>                   | 4.2 ± 3.6 <sup>↵</sup>   | 5.3 ± 2.2 <sup>↵</sup>   | 4.7 ± 3.1 <sup>↵</sup>   | 6.8 ± 5.8 <sup>↵</sup>   | 7.4 ± 3.9 <sup>↵</sup>   | 7.1 ± 4.9 <sup>↵</sup>   | 9.0 ± 7.7 <sup>↵</sup>   | 9.8 ± 5.8 <sup>↵</sup>   | 9.4 ± 6.8 <sup>↵</sup>   | 7.6 ± 6.4 <sup>↵</sup>   |
| HONO/NO <sub>x</sub> <sup>↵</sup><br>(%) <sup>↵</sup>                   | 3.3 ± 2.7 <sup>↵</sup>   | 6.0 ± 5.6 <sup>↵</sup>   | 4.5 ± 4.5 <sup>↵</sup>   | 4.4 ± 2.5 <sup>↵</sup>   | 4.6 ± 1.7 <sup>↵</sup>   | 4.5 ± 2.1 <sup>↵</sup>   | 5.3 ± 3.4 <sup>↵</sup>   | 5.8 ± 4.7 <sup>↵</sup>   | 5.6 ± 4.1 <sup>↵</sup>   | 4.9 ± 3.8 <sup>↵</sup>   |
| RH <sup>↵</sup><br>(%) <sup>↵</sup>                                     | 30 ± 21 <sup>↵</sup>     | 36 ± 20 <sup>↵</sup>     | 33 ± 21 <sup>↵</sup>     | 44 ± 17 <sup>↵</sup>     | 54 ± 18 <sup>↵</sup>     | 49 ± 18 <sup>↵</sup>     | 64 ± 18 <sup>↵</sup>     | 73 ± 13 <sup>↵</sup>     | 68 ± 16 <sup>↵</sup>     | 50 ± 24 <sup>↵</sup>     |
| WS <sup>↵</sup><br>( $\text{m s}^{-1}$ ) <sup>↵</sup>                   | 0.8 ± 1.0 <sup>↵</sup>   | 0.5 ± 0.7 <sup>↵</sup>   | 0.7 ± 0.9 <sup>↵</sup>   | 1.1 ± 1.4 <sup>↵</sup>   | 0.6 ± 0.9 <sup>↵</sup>   | 0.9 ± 1.2 <sup>↵</sup>   | 0.4 ± 0.7 <sup>↵</sup>   | 0.3 ± 0.6 <sup>↵</sup>   | 0.4 ± 0.7 <sup>↵</sup>   | 0.6 ± 0.9 <sup>↵</sup>   |
| T <sup>↵</sup><br>(°C) <sup>↵</sup>                                     | 4.3 ± 4.6 <sup>↵</sup>   | 2.7 ± 3.6 <sup>↵</sup>   | 3.5 ± 4.2 <sup>↵</sup>   | 3.7 ± 3.3 <sup>↵</sup>   | 2.6 ± 3.1 <sup>↵</sup>   | 3.1 ± 3.2 <sup>↵</sup>   | 4.6 ± 3.2 <sup>↵</sup>   | 2.9 ± 2.1 <sup>↵</sup>   | 3.8 ± 2.8 <sup>↵</sup>   | 3.5 ± 3.5 <sup>↵</sup>   |

Delete decimal points for RH (L182, 185, 187, 194, Table 2, etc.),

Response:

---

L 205: ...with RH ranging from 5 to 79%...

L 207: ...RH ranging from 17 to 86%...

L 210: ...RH ranging from 30 to 96%...

L 217: ...RH in CD, PD, and SPD periods was 33, 49, and 68%...

level in  $\mu\text{g m}^{-3}$  (L 198,etc.),

Response:

L 221: ...values of  $\text{NO}_2$  were 25, 33, and 42 ppbv (46, 63, and  $78 \mu\text{g m}^{-3}$  lower than...

for ratio (L 34, 304, etc.).

Response:

L 34: ...HONO ratio (less than 20%) was approximately 77%...

L 343: ... $\text{HONO}_{\text{emission}}/\text{HONO}$  ratio less than 20% was approximately 77%...

7. Be consistent with the format of unit. You use  $\text{m s}^{-1}$  (or  $\mu\text{g m}^{-3}$ ), yet  $\text{m/s}$  and  $\mu\text{g}\cdot\text{m}^{-3}$  are in Table 2 (delete centered dot). Use ppbv throughout the text, but ppbV in Tables 1 and 2 and Fig. 8 (some ppbv and one uses ppbV).

Response: Sorry for the careless. The problems have been revised. And we checked the full text to avoid the problems.

**Table 1.**

Data statistics of HONO, PM<sub>2.5</sub>, NO<sub>2</sub>, NO, NO<sub>x</sub>, HONO/NO<sub>2</sub>, HONO/NO<sub>x</sub>, O<sub>3</sub>, CO, T, RH, and WS during the measurement period, mean value ± standard deviation.

| Trace-gases <sup>⊃</sup>                                             | ·CD <sup>⊃</sup>       |                        |                        | ·PD <sup>⊃</sup>       |                        |                        | ·SPD <sup>⊃</sup>      |                        |                        | Total days <sup>⊃</sup> |
|----------------------------------------------------------------------|------------------------|------------------------|------------------------|------------------------|------------------------|------------------------|------------------------|------------------------|------------------------|-------------------------|
|                                                                      | Day <sup>⊃</sup>       | Night <sup>⊃</sup>     | All <sup>⊃</sup>       | Day <sup>⊃</sup>       | Night <sup>⊃</sup>     | All <sup>⊃</sup>       | Day <sup>⊃</sup>       | Night <sup>⊃</sup>     | All <sup>⊃</sup>       |                         |
| PM <sub>2.5</sub> <sup>⊃</sup><br>(μg m <sup>-3</sup> ) <sup>⊃</sup> | 37±15 <sup>⊃</sup>     | 41±17 <sup>⊃</sup>     | 39±16 <sup>⊃</sup>     | 80±32 <sup>⊃</sup>     | 93±46 <sup>⊃</sup>     | 87±40 <sup>⊃</sup>     | 148±29 <sup>⊃</sup>    | 147±33 <sup>⊃</sup>    | 147±31 <sup>⊃</sup>    | 91±54 <sup>⊃</sup>      |
| HONO <sup>⊃</sup><br>(ppbv) <sup>⊃</sup>                             | 0.9±0.7 <sup>⊃</sup>   | 1.4±0.7 <sup>⊃</sup>   | 1.1±0.7 <sup>⊃</sup>   | 1.9±1.7 <sup>⊃</sup>   | 2.7±1.3 <sup>⊃</sup>   | 2.3±1.5 <sup>⊃</sup>   | 3.5±2.7 <sup>⊃</sup>   | 4.0±1.1 <sup>⊃</sup>   | 3.7±2.1 <sup>⊃</sup>   | 2.5±1.9 <sup>⊃</sup>    |
| CO <sup>⊃</sup><br>(ppmv) <sup>⊃</sup>                               | 1±0.3 <sup>⊃</sup>     | 1±0.3 <sup>⊃</sup>     | 1±0.3 <sup>⊃</sup>     | 1±0.4 <sup>⊃</sup>     | 1±0.6 <sup>⊃</sup>     | 1±0.5 <sup>⊃</sup>     | 2±0.6 <sup>⊃</sup>     | 2±0.4 <sup>⊃</sup>     | 2±0.5 <sup>⊃</sup>     | 1±0.6 <sup>⊃</sup>      |
| NO <sup>⊃</sup><br>(ppbv) <sup>⊃</sup>                               | 18.4±39.3 <sup>⊃</sup> | 15±34.3 <sup>⊃</sup>   | 16.7±36.8 <sup>⊃</sup> | 20.3±26.2 <sup>⊃</sup> | 30.7±33.6 <sup>⊃</sup> | 25.5±30.4 <sup>⊃</sup> | 40.8±50.8 <sup>⊃</sup> | 64.3±82.1 <sup>⊃</sup> | 52.5±68.9 <sup>⊃</sup> | 31.8±51.4 <sup>⊃</sup>  |
| NO <sub>2</sub> <sup>⊃</sup><br>(ppbv) <sup>⊃</sup>                  | 23±13 <sup>⊃</sup>     | 26±13 <sup>⊃</sup>     | 25±13 <sup>⊃</sup>     | 29±9 <sup>⊃</sup>      | 38±10 <sup>⊃</sup>     | 33±11 <sup>⊃</sup>     | 40±11 <sup>⊃</sup>     | 43±10 <sup>⊃</sup>     | 42±11 <sup>⊃</sup>     | 33±14 <sup>⊃</sup>      |
| O <sub>3</sub> <sup>⊃</sup><br>(ppbv) <sup>⊃</sup>                   | 21.4±11.5 <sup>⊃</sup> | 13.8±10.0 <sup>⊃</sup> | 17.6±11.4 <sup>⊃</sup> | 17.4±11.9 <sup>⊃</sup> | 8.9±8.1 <sup>⊃</sup>   | 13.1±10.9 <sup>⊃</sup> | 15.6±14.2 <sup>⊃</sup> | 7.9±7.1 <sup>⊃</sup>   | 11.8±11.8 <sup>⊃</sup> | 14.2±11.7 <sup>⊃</sup>  |
| HONO/NO <sub>2</sub> <sup>⊃</sup><br>(%) <sup>⊃</sup>                | 4.2±3.6 <sup>⊃</sup>   | 5.3±2.2 <sup>⊃</sup>   | 4.7±3.1 <sup>⊃</sup>   | 6.8±5.8 <sup>⊃</sup>   | 7.4±3.9 <sup>⊃</sup>   | 7.1±4.9 <sup>⊃</sup>   | 9.0±7.7 <sup>⊃</sup>   | 9.8±5.8 <sup>⊃</sup>   | 9.4±6.8 <sup>⊃</sup>   | 7.6±6.4 <sup>⊃</sup>    |
| HONO/NO <sub>x</sub> <sup>⊃</sup><br>(%) <sup>⊃</sup>                | 3.3±2.7 <sup>⊃</sup>   | 6.0±5.6 <sup>⊃</sup>   | 4.5±4.5 <sup>⊃</sup>   | 4.4±2.5 <sup>⊃</sup>   | 4.6±1.7 <sup>⊃</sup>   | 4.5±2.1 <sup>⊃</sup>   | 5.3±3.4 <sup>⊃</sup>   | 5.8±4.7 <sup>⊃</sup>   | 5.6±4.1 <sup>⊃</sup>   | 4.9±3.8 <sup>⊃</sup>    |
| RH <sup>⊃</sup><br>(%) <sup>⊃</sup>                                  | 30±21 <sup>⊃</sup>     | 36±20 <sup>⊃</sup>     | 33±21 <sup>⊃</sup>     | 44±17 <sup>⊃</sup>     | 54±18 <sup>⊃</sup>     | 49±18 <sup>⊃</sup>     | 64±18 <sup>⊃</sup>     | 73±13 <sup>⊃</sup>     | 68±16 <sup>⊃</sup>     | 50±24 <sup>⊃</sup>      |
| WS <sup>⊃</sup><br>(m·s <sup>-1</sup> ) <sup>⊃</sup>                 | 0.8±1.0 <sup>⊃</sup>   | 0.5±0.7 <sup>⊃</sup>   | 0.7±0.9 <sup>⊃</sup>   | 1.1±1.4 <sup>⊃</sup>   | 0.6±0.9 <sup>⊃</sup>   | 0.9±1.2 <sup>⊃</sup>   | 0.4±0.7 <sup>⊃</sup>   | 0.3±0.6 <sup>⊃</sup>   | 0.4±0.7 <sup>⊃</sup>   | 0.6±0.9 <sup>⊃</sup>    |
| T <sup>⊃</sup><br>(°C) <sup>⊃</sup>                                  | 4.3±4.6 <sup>⊃</sup>   | 2.7±3.6 <sup>⊃</sup>   | 3.5±4.2 <sup>⊃</sup>   | 3.7±3.3 <sup>⊃</sup>   | 2.6±3.1 <sup>⊃</sup>   | 3.1±3.2 <sup>⊃</sup>   | 4.6±3.2 <sup>⊃</sup>   | 2.9±2.1 <sup>⊃</sup>   | 3.8±2.8 <sup>⊃</sup>   | 3.5±3.5 <sup>⊃</sup>    |

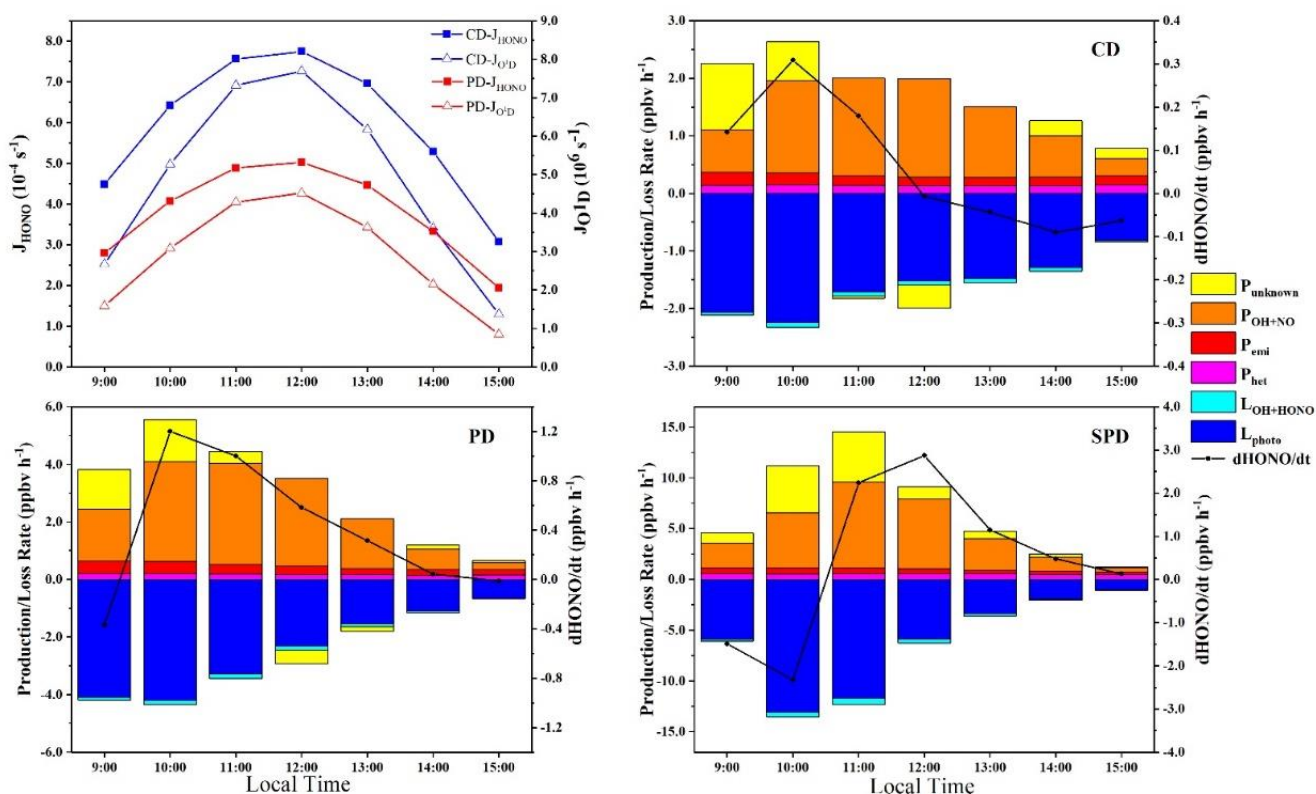

**Fig. 9.** The average profiles of  $J_{\text{HONO}}$  and  $J_{\text{O}^1\text{D}}$  concentrations during the daytime, and production and loss rate of the daytime HONO in CD, PD and SPD periods.

8. Data need show the variation; use Box plots or error bars in figures and add standard deviation in tables.

Response: OK. With too many error bars in figures, it will make the figures look unclear. So the error bars of **Fig. 4**, **Fig. 5**, and **Fig. 8** were placed separately in the tables of the supplement (**Table S2**, **Table S3**, and **Table S4**).

9. Need proper citations for equations and rate constants, e.g., in L 247, 250

Response: Sorry, it was our error of citations. Proper citations have been added.

L 278: At  $T = 298 \text{ K}$  and  $P = 101 \text{ kPa}$ ... respectively (Atkinson et al., 2004; Sander et al., 2003).



10. The comparison with others (Table 1) may not be useful and must be made with care since the studied year is different (some in 2012 – may not have adequate end-of-the pipe treatment), nature of sampling sites is different (some in urban, suburban and even rural sites) and atmospheric dynamics in these regions are far different.

Response: You're right. The comparison with others must be made with care since the studied year is different. Therefore, only the observation data of HONO in the last ten years were used for comparative analysis of HONO concentration changes in urban. We removed the HONO level (Jun.-Jul. 2005 in Germany) in the revised text (Table 2). We analyzed the effect of the site on HONO concentration in urban.

So, we added sampling sites in Table 2.

**Table 2.**

Comparisons of the daytime and nighttime HONO level, HONO/NO<sub>2</sub>, and HONO/NO<sub>x</sub> mean values in Zhengzhou and other sites around the world.

| Date (Site) <sup>↵</sup>                                           | Instrument <sup>↵</sup>                                                        | HONO (ppbv) <sup>↵</sup> |                    |                  | HONO/NO <sub>2</sub> (%) <sup>↵</sup> |                    | HONO/NO <sub>x</sub> (%) <sup>↵</sup> |                    | Reference <sup>↵</sup>               |
|--------------------------------------------------------------------|--------------------------------------------------------------------------------|--------------------------|--------------------|------------------|---------------------------------------|--------------------|---------------------------------------|--------------------|--------------------------------------|
|                                                                    |                                                                                | Day <sup>↵</sup>         | Night <sup>↵</sup> | N/D <sup>↵</sup> | Day <sup>↵</sup>                      | Night <sup>↵</sup> | Day <sup>↵</sup>                      | Night <sup>↵</sup> |                                      |
| Oct.–Nov. 2014 <sup>↵</sup><br>(Beijing, urban) <sup>↵</sup>       | LOPAP <sup>↵</sup><br>(long path absorption<br>photometer) <sup>↵</sup>        | 0.9 <sup>↵</sup>         | 1.8 <sup>↵</sup>   | 2.0 <sup>↵</sup> | 2.6 <sup>↵</sup>                      | 4.6 <sup>↵</sup>   | 1.7 <sup>↵</sup>                      | 2.2 <sup>↵</sup>   | Tong et al., 2015 <sup>↵</sup>       |
|                                                                    |                                                                                | 1.8 <sup>↵</sup>         | 2.1 <sup>↵</sup>   | 1.2 <sup>↵</sup> | 3.8 <sup>↵</sup>                      | 4.3 <sup>↵</sup>   | 2.5 <sup>↵</sup>                      | 2.5 <sup>↵</sup>   |                                      |
| Feb.–Mar. 2014 <sup>↵</sup><br>(Beijing, urban) <sup>↵</sup>       | LOPAP <sup>↵</sup>                                                             |                          |                    |                  | (Severe haze) <sup>↵</sup>            |                    |                                       |                    | Hou et al., 2016 <sup>↵</sup>        |
|                                                                    |                                                                                | 0.5 <sup>↵</sup>         | 0.9 <sup>↵</sup>   | 1.8 <sup>↵</sup> | 7.8 <sup>↵</sup>                      | 3.0 <sup>↵</sup>   | 5.1 <sup>↵</sup>                      | 2.4 <sup>↵</sup>   |                                      |
|                                                                    |                                                                                |                          |                    |                  | (Clean) <sup>↵</sup>                  |                    |                                       |                    |                                      |
| Jul. 2006 <sup>↵</sup><br>(Guangzhou, rural) <sup>↵</sup>          | LOPAP <sup>↵</sup>                                                             | 0.2 <sup>↵</sup>         | 0.9 <sup>↵</sup>   | 4.5 <sup>↵</sup> | 1.0 <sup>↵</sup>                      | 2.5 <sup>↵</sup>   | 4.3 <sup>↵</sup>                      | 4.5 <sup>↵</sup>   | Li et al., 2012 <sup>↵</sup>         |
| Jul. 2014–Aug. 2015 <sup>↵</sup><br>(Xi'an, urban) <sup>↵</sup>    | LOPAP <sup>↵</sup>                                                             | 0.5 <sup>↵</sup>         | 1.6 <sup>↵</sup>   | 3.2 <sup>↵</sup> | 3.3 <sup>↵</sup>                      | 6.2 <sup>↵</sup>   | ↵                                     | ↵                  | Huang et al., 2017 <sup>↵</sup>      |
| Aug. 2010–Jun. 2012 <sup>↵</sup><br>(Shanghai, urban) <sup>↵</sup> | Active DOAS <sup>↵</sup>                                                       | 0.8 <sup>↵</sup>         | 1.1 <sup>↵</sup>   | 1.4 <sup>↵</sup> | 4.2 <sup>↵</sup>                      | 4.5 <sup>↵</sup>   | ↵                                     | ↵                  | Wang et al., 2013 <sup>↵</sup>       |
| Jul. 2009 <sup>↵</sup><br>(Paris, urban) <sup>↵</sup>              | wet chemical derivatization<br>technique-HPLC/UV-VIS<br>detection <sup>↵</sup> | 0.1 <sup>↵</sup>         | 0.2 <sup>↵</sup>   | 2.0 <sup>↵</sup> | 3.3 <sup>↵</sup>                      | 2.5 <sup>↵</sup>   | ↵                                     | ↵                  | Michoud et al.,<br>2014 <sup>↵</sup> |
| Jan. 2019 <sup>↵</sup>                                             | AIM <sup>↵</sup>                                                               | 2.2 <sup>↵</sup>         | 2.8 <sup>↵</sup>   | 1.3 <sup>↵</sup> | 6.8 <sup>↵</sup>                      | 8.5 <sup>↵</sup>   | 4.4 <sup>↵</sup>                      | 5.5 <sup>↵</sup>   | This study <sup>↵</sup>              |

Jul. 2006 (Guangzhou, urban): This paper is a relatively early study on the HONO concentration level in China. We thought this paper still had a certain level of high

---

quality, so we put it in the table for comparison.

For avoiding this problem of atmospheric dynamics, we used observed values of HONO in Chinese cities mostly.

11. Why no discussion of OH production rate as a function of O<sub>3</sub> levels?? In other words, is any HONO information related to O<sub>3</sub> pollution level?? It is relevant since •OH radical generated from HONO is in turn used for O<sub>3</sub> production.

Response: Thank you for the comment. We hold the opinion that the discussion of OH production rate as a function of O<sub>3</sub> levels can be written as an article on account of complexity. At the same time, we found that the negative correlation between HONO and O<sub>3</sub> was lower in the entire period, and it was known from **Fig 4d** that the heavier the pollution level, the lower the O<sub>3</sub> concentration.

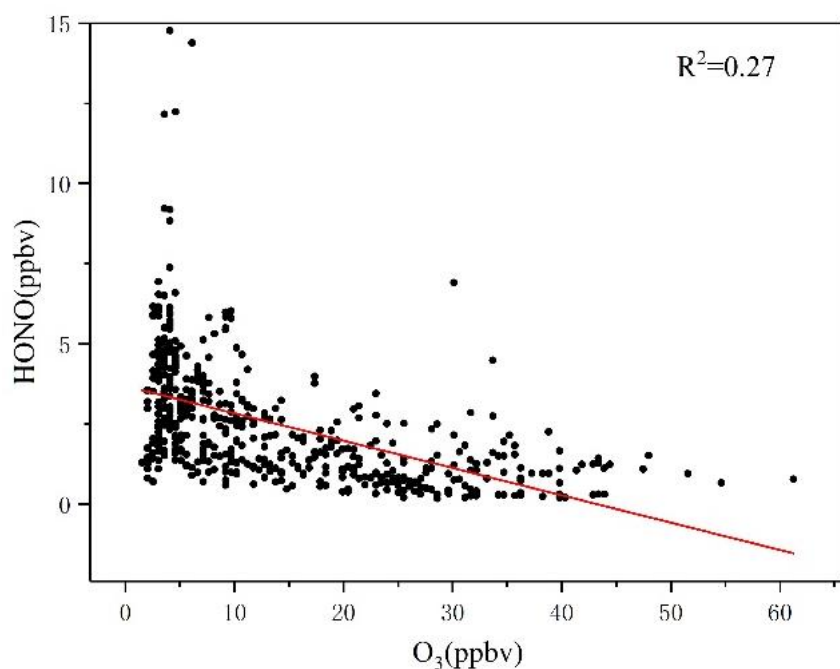

**Figure** The correlation between HONO and O<sub>3</sub>.

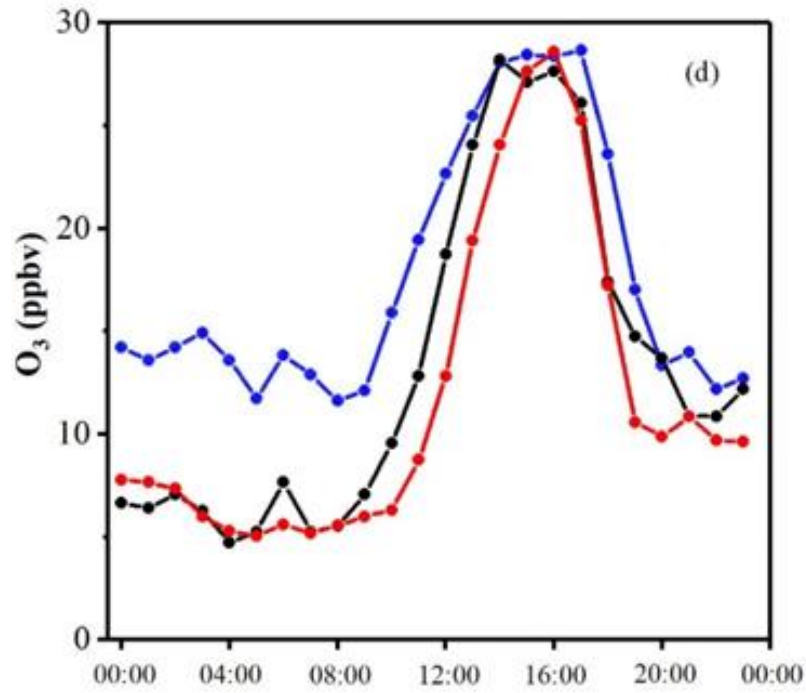

**Fig. 4d.** Diurnal variations of O<sub>3</sub>. The blue points and lines represented the CD period; the black points and lines represented the PD period; the red points and lines represented the SPD period.

---

## Specific comments:

### 1. "Title is misleading"

Response: OK. We have added "at an urban site" in the title. The title is "Characteristics, sources, and reactions of nitrous acid during winter at an urban site in the Central Plains Economic Region in China."

### 2. L 15: All of a sudden, the phrase "three sources" pops up. Need to clearly state what they are.

Response: According to your comment, the sentence was modified in the revised text.

L 14-15: The contribution of the homogeneous reaction, heterogeneous conversion, and direct emission to HONO sources varied under different pollution levels.

### 3. Why not place centered dot symbol for OH radical? or •OH

Response: OK. We have changed  $\cdot\text{OH}$  for  $\bullet\text{OH}$  in the revised text.

L 44: ...HONO to  $\bullet\text{OH}$  concentration...

L 47: ...most important primary source of  $\bullet\text{OH}$ ...

L 77: ...react with the  $\bullet\text{OH}$ ...

L 96: ...the importance of the  $\bullet\text{OH}$ ...

L 280: ...concentration of  $\bullet\text{OH}$ ...

L 282: ...the average concentration of  $\bullet\text{OH}$ ...

L 283: ...the same  $\bullet\text{OH}$ ...

L 471: ... $\bullet\text{OH}$  and NO were formed...

L 495: ...values of  $J_{\text{HONO}}$  and  $\bullet\text{OH}$  concentration...

---

4. Use a proper term in lieu of rate which refers to time

Response: Sorry for the careless. We have removed the word “rate”.

L 44: ...the contribution of HONO to  $\cdot\text{OH}$  concentration can reach 25–50%...”

5. L 45: Why only these two? What about others including HONO itself and acetone?

Response: We have modified the sentence in the revised text.

L 43-46: ...the contribution of HONO to  $\cdot\text{OH}$  concentration can reach 25%–50%, especially when the concentration of OH radicals produced by the photolysis of ozone, acetone, and formaldehyde...

6. L 49: what reaction? Should be more than one reaction.

Response: Sorry for my confusion. We have changed “reaction” for “the changes in the contribution of the homogeneous reaction, heterogeneous conversion, and direct emission” in the revised text.

L 51-54: ...the changes in the contribution of the homogeneous reaction, heterogeneous conversion, and direct emission during pollution can be observed...

7. Citation:

Response: Sorry for my carelessness. All modifications have been made, and we have checked the full text.

a. Provide adequate spacing between citations, or Hou et al., 2016; Michoud et.... (need a spacing before the 2<sup>nd</sup> citation).

---

L 57: ...(Elshorbany et al., 2012; Winer and Biermann, 1994)...

L 60: ...(Duan et al., 2018; Min et al., 2016)...

L 61: ...(Hirokawa et al., 2009; Roberts et al., 2010).

L 68: ...(Hou et al., 2016; Michoud et al., 2014).

L 70: ...(Acker et al., 2005; Grassian, 2001; Kurtenbach et al., 2001).

b. Make sure all cited references are listed and vice versa. For example, citations in L 55 (L 60) and Table 1 (Elshorbany et al., 2012) are not listed.

L 785: VandenBoer, T. C., Markovic...

L 606: Elshorbany, Y. F., Steil, B., Brühl, C...

c. Delete redundant citations. No need to cite twice in the beginning and at the end of the sentence. Pls change throughout the text (L 75, 82, 88, 93, 156, 157, 246, etc.) by delete the second citation.

L 72: Kurtenbach et al. (2001)...

L 77: Tong et al. (2015)...

L 90: Hao et al. (2006)...

L 96: Su et al. (2008a)...

L 105: Spataro et al. (2013)...

L 108: Tong et al. (2015)...

d. L 95; et al. (2013); delete the extra comma.

L 105: Spataro et al. (2013)...

e. Avid excessive self-citations (one is enough, e.g., L 115, 116, etc.)

---

f. For the same last name, use the format of Jiang et al., 2018c, 2018e; Liu.... (L 115).

Pls change throughout the text.

L 123-127: As the core city of CPER, Zhengzhou characterized by severe PM (particulate matters) pollution (Jiang et al., 2018b), is selected in the study. In recent years, comprehensive PM research has been conducted on the chemical characteristics of PM in Zhengzhou. (Li et al., 2019), source apportionment (Liu et al., 2019), health risks (Jiang et al., 2019), and emission source profiles (Jiang et al., 2018a).

g. L 140: why cite this? Need year for this reference.

L 163-164: ...(7:00–18:00 local time)...

h. L 181: why cite this one? Delete

L 204: ...Air Quality Standards (CNAAQs) ( $75 \mu\text{g m}^{-3}$ )...

i. L 313: Acker et al. (2005) reported...

L 352: ...Acker et al. (2005)...

8. L 60: what is 1:1??

Response: Sorry for my confusion. Through the comparison of measurement results, the correlation between SC-AP deployed onsite and AIM tended to 1. For avoiding the confusion, we have removed the words “; the results exhibited a consistency of nearly 1:1” in the revised text.

---

L 64-66: Compared with HONO measured by SC-AP deployed onsite, HONO measured by AIM has a small error and is within the acceptable analytical uncertainty (VandenBoer et al., 2014).

9. L 79: There is no connection between these two sentences. Need a sentence (such as revised R3 reaction) leading to the following sentence.

Response: OK. We have added the sentence between these two sentences in the revised text.

L 82-87: Such calculations have been applied in studies on homogeneous reactions and daytime budgets (Hou et al., 2016; Huang et al., 2017). These are studies of homogeneous reactions, and some researchers have begun to explore the mechanism of NO<sub>2</sub> heterogeneous reactions. Finlayson-Pitts et al. (2003) studied the mechanism of chemical adsorption of NO<sub>2</sub> and H ions on the adsorbed surface...

10. L 123: These two measurements (PM<sub>2.5</sub> and HONO) cannot clarify the sources, sinks and reactions. Pls reword.

Response: Sorry, we have modified the sentence in the revised text.

L 133-134: The levels of PM<sub>2.5</sub> were divided into three periods to analyze the HONO sources, sinks, and reactions in different periods.

11. L 173: what is uncertainty of AIM? How about MDL for other gases??

Response: Thank you for your comment. Measurement technique, detection limit, and accuracy of measured species are shown in Table S1 in the supplement.

**Table S1.**

Measured species and performance of the instruments.



| Species           | Measurement technique                    | Detection limit        | Accuracy |
|-------------------|------------------------------------------|------------------------|----------|
| PM <sub>2.5</sub> | Tapered Element Oscillating Microbalance | 1.5 µg m <sup>-3</sup> | ± 5%     |
| HONO              | Ion Chromatography                       | 4 pptv                 | ± 20%    |
| CO                | Absorbs Infrared Radiation               | 40 ppbv                | ± 5%     |
| NO                | Chemiluminescence                        | 60 pptv                | ± 20%    |
| NO <sub>2</sub>   | Chemiluminescence                        | 300 pptv               | ± 20%    |
| O <sub>3</sub>    | UV Photometry                            | 0.5 ppbv               | ± 5%     |

The results came from instrument manufacturers.

12. L 190: Table 1 must come before Table 2. Rearrange the table number.

Response: OK. We have rearranged the table number.

L 213: **Table 1** lists the data statistics...

L 265: ...listed in **Table 2**.

13. Interesting. You cover all these parameters (L 199-204) shown in Fig. 2, yet Fig. 2 is mentioned several sentences later (L205). The same illogical sequence is found in L 403 which mentions  $P_{\text{unknown}}$  and  $P_{\text{emi}}$ , but the equation for these is shown much later (L 436). Also need to cover these rates for estimating daytime HONO budget.

Response: Sorry for my confusion. The illogical sequence had been changed. We have modified the sentences in the revised text.

L 223-226: **Fig. 2** shows the concentration changes in HONO...The variations of the average HONO, PM<sub>2.5</sub>, NO<sub>2</sub>...

L 456-465: ...d HONO / d t = sources – sinks

$$= (P_{\text{unknown}} + P_{\text{OH+NO}} + P_{\text{emi}} + P_{\text{het}}) - (L_{\text{OH+HONO}} + L_{\text{photo}}) \quad (4),$$

$$P_{\text{OH+NO}} = k_{\text{OH+NO}} [\text{OH}] [\text{NO}] \quad (5),$$

---

$$L_{\text{OH+HONO}} = k_{\text{OH+HONO}} [\text{OH}] [\text{HONO}] \quad (6).$$

The  $d \text{HONO} / dt$  calculated from...

14. L 240: why??

Response: Sorry for my carelessness. Although observations of HONO levels in Zhengzhou were different from other cities because of periods, seasons, and meteorological conditions, a higher concentration of HONO was found in Zhengzhou. This situation attracted our attention. We thought the environmental impact of the increase in pollutant emissions and the number of vehicles exceeds the efforts of Zhengzhou to protect the atmospheric environment. Total  $\text{NO}_x$  emissions in cities have been declining year by year due to Chinese government emission control measures, but some Chinese cities are still in high- $\text{NO}_x$  areas (e.g. Beijing, Shanghai, Guangzhou, and Zhengzhou.) (Kim et al., 2015; Liu et al., 2017). Therefore, we have added the sentence in the full text.

L 267-269: The reason for this phenomenon is that Zhengzhou is a high- $\text{NO}_x$  area which provides HONO with abundant precursors ( $\text{NO}_2$  and  $\text{NO}$ ) in winter (Kim et al., 2015).

15. L 252: why in reference to Beijing?

Response: We revisit and determine the OH concentration. The OH concentration previously used is  $1 \times 10^6$  molecule  $\text{cm}^{-3}$  is obtained by the simulation (Lelieveld et al., 2016). So, we have modified the sentences in the revised text.

L 280-285:  $[\text{OH}]$  is the concentration of  $\cdot\text{OH}$  that was not measured during the campaign. Therefore, Tan et al. (2018) found that by the field measurement, the average concentration of  $\cdot\text{OH}$  in Beijing at nighttime was about  $2.5 \times 10^5$  molecule  $\text{cm}^{-3}$ . Moreover, the same  $\cdot\text{OH}$  concentration was also used to calculate the

---

homogeneous reaction of HONO in the recent researches of Beijing (Zhang et al., 2019), Shanghai (Cui et al., 2018), and Xi'an (Huang et al., 2017).

Finally, we chose the average concentration of  $\cdot\text{OH}$  in Beijing was about  $2.5 \times 10^5$  molecule  $\text{cm}^{-3}$  as the nighttime  $\cdot\text{OH}$  concentration in Zhengzhou.

16. L 253: Can you calculate OH radical concentration from those discussed later in L 418?

Response: OK. The concentration of  $\cdot\text{OH}$  during the daytime was calculated by the TUV model. But there is no sunlight at night, so it cannot be counted.

17. L 287: You are talking about night and mentioned no pollution source near the site. Why all these calculations related to traffic?? Unclear.

Response: Sorry for your comment. The sentence is not clear enough. So, we have changed "because no pollution source was near the measurement site" for "because the site is close to the western Fourth-Ring Expressway of Zhengzhou City and about Lian Huo Expressway to the north." in the revised text.

L 324-326: In the current study, directly emitted HONO could have been generated by vehicle exhaust and biomass combustion because the site is close to the western Fourth-Ring Expressway of Zhengzhou City and about Lian Huo Expressway to the north.

18. Pls explain the contradictory statements: important pathway (L 321) and unimportant pathway (L 20) for heterogeneous reaction for HONO formation.

Response: Sorry for my carelessness. With respect to direct emissions, heterogeneous reactions may be a more important pathway for HONO production.

---

The HONO/NO<sub>2</sub> ratio calculated in this work is much larger than that calculated for direct emission (< 1%) (Kurtenbach et al., 2001), suggesting that heterogeneous reactions may be a more important pathway for HONO production than direct emissions.

However, the average conversions of NO<sub>2</sub> (C<sub>HONO</sub>) in CD, PD, and SPD periods were 0.72×10<sup>-2</sup>, 0.64×10<sup>-2</sup>, and 1.54×10<sup>-2</sup> h<sup>-1</sup>, respectively, indicating that the heterogeneous conversion of NO<sub>2</sub> was unimportant than the homogeneous reaction. So, in order to prevent confusion, we have modified the sentence in the revised text.

L 17-20: The average conversions of NO<sub>2</sub> (C<sub>HONO</sub>) in CD, PD, and SPD periods were 0.72×10<sup>-2</sup>, 0.64×10<sup>-2</sup>, and 1.54×10<sup>-2</sup> h<sup>-1</sup>, respectively, indicating that the heterogeneous conversion of NO<sub>2</sub> was unimportant than the homogeneous reaction.

19. Use the stack format for equations in a separate line (L 389); use the solidus format for those within the line (L 402).

Response: Thank you. The equations had been changed.

L 438: 
$$C_{\text{HONO}} = \frac{([\text{HONO}_{\text{correct}}]_{t_2} - [\text{HONO}_{\text{correct}}]_{t_1})}{(t_2 - t_1) [\text{NO}_2]}$$

L 456:  $d \text{HONO} / dt = \text{sources} - \text{sinks}$

20. L 431: Why the same values for both PD and SPD? That means you treat PD and SPD the same.

Response: OK. These are the averages per hour of J<sub>HONO</sub> and J<sub>O'D</sub> for PD and SPD. We treated PD and SPD the same. The reason is that the main input parameters of TUV cannot be obtained directly, so we quoted the input parameters in the literature. However, the input parameters of PD and SPD are not

---

distinguished in the papers. We wanted to study that under the same output conditions from the TUV model, the impact of different pollution levels changed on the daytime budget. We have added the sentence in the revised text.

L 491-493: We wanted to study that under the same output conditions from the TUV model in the PD and SPD periods, the impact of different pollution levels changed on the daytime budget.

21. Fig. 1: How could one tell the wind direction?? There is no shade area of black and red color (caption says so). Change in Fig. 2 too.

Response: Sorry. We have removed the word, “WD” in **Fig. 1** in the revised text. The colors of the shaded area were redefined in **Fig. 1** and **Fig. 2**. The shaded areas: white for the CD period; gray for the PD period; red for the SPD period.

22. Fig. 6d and RH effect: Was the phenomenon also observed by others?? Who is to say that 77% is the inflection point? Just say “reach a certain high level,HONO...”

Response: Thank you for your comment. The phenomenon also observed by other studies (Cui et al., 2018; Huang et al., 2017; Tong et al., 2015). “52% and 77%” was removed in the revised text.

L 400-402: When RH was increased, the HONO/NO<sub>2</sub> ratio began to increase rapidly with RH. The HONO/NO<sub>2</sub> ratio decreased when RH reached a certain high level.

L 409-410: However, the surface reached saturation when RH reached a certain high level.

23. References:

Response: Sorry for my carelessness. The problems had been changed in the

---

revised text.

- Be consistent! Use lowercases for journals (e.g., L 502, 515, etc.)

- Need periods after all journal abbreviations (e.g., L 502, 515, etc.)

L 565: ...Atmos. Res., 74, 507-524...

L 569: ...J. Geophys. Res.,...

- Adequate subscript/superscript (e.g., L 535)

L 582: ...gas phase reactions of O<sub>x</sub>, HO<sub>x</sub>, NO<sub>x</sub>, and SO<sub>x</sub>...

- Use correct journal, or Phy. Chem. Chem Phys., (L 536)

L 583: ...Atmos. Chem. Phys.,...

- Use lowercases for articles (e.g., L 505)

L 563: ...Concentrations of nitrous acid, nitric acid, nitrite and nitrate in the gas and aerosol...

- L 546 ref is not cited.

The reference has been removed in the revised text.

Tech/English comments:

Response: Thank you for your carefulness. The problems have been modified and modified issues have been marked in yellow throughout the revised text. The parts that need explanation have been listed.

1. L 13, 178, 179: Use polluted (not pollution)

---

L 12: ...polluted days (PD), and severely polluted days...

L 200-201: ...clean days [CD], polluted days [PD], and severely polluted...

2. L 33: Use was (not should be)

L 33: ...OH + HONO, was at least 0.22 ppbv h<sup>-1</sup>...

3. Be consistent about the use of verb tense; some use past tense in the first part of the sentence with present tense used in the latter part.

L 34-35: ...(less than 20%) was approximately 77%, which suggested...

4. L 32, 279: Delete the redundant abatement (first one)

L 32-33: ...hourly level of HONO abatement pathways...

5. L 44: delete rate

L 43-44: ...the contribution of HONO to ·OH...

6. L 54: UV/Vis

L 58-59: ...stripping coil-UV/Vis...

7. L 56: result comparison

L 62: A result comparison of different instruments...

---

8. L 67: have discovered

L 72: ...have discovered that motor vehicles...

9. L 68-69: How does ratio “account for”? Use “is” 0.1-0.8%

L 74: ...(aside from NO<sub>x</sub> and other pollutants) is 0.1–0.8%.

10. Reword awkward L 81, word “radiation” (L 93), confusing (L 108-110).

L 85-87: Finlayson-Pitts et al. (2003) studied the mechanism of chemical adsorption of NO<sub>2</sub> and H ions on the adsorbed surface was revealed by using isotope-labeled water.

L 95-98: Su et al. (2008) revealed the importance of the ·OH from HONO during daytime (9:00–15:00 local time) and found that many unknown sources which are closely related to the solar radiation leading to HONO formation.

L 119-123: The file described the different factors which affect atmospheric pollution, including the level of economic development, energy structure, industrial structure and geographical location (solar radiation) with the Yangtze River Delta, Pearl River Delta, and Jing-Jin-Ji region.

11. L 99: Use pathway of...: mechanism is the same, but pathway is different.

L 109: ...the pathway of HONO formation mechanism, namely...

12. L 107: “Food Production and Modern Agriculture” specified by (not published)

This website can not be found because of the update. We have changed



---

“<http://www.ndrc.gov.cn/zcfb/zcfbtz/201212/P020121203614181974825.pdf>” for  
“[http://www.gov.cn/zhengce/content/2011-10/07/content\\_8208.htm](http://www.gov.cn/zhengce/content/2011-10/07/content_8208.htm)”, in the  
revised text (L 119).

13. L 112: delete “is” and insert “is” ahead of selected

L 124: ...is selected in the study.

14. L 114: Not Zhengzhou chemical characteristics. Should have written as:  
chemical characteristics of PM in Zhengzhou.

L 125-126: ...on the chemical characteristics of PM in Zhengzhou...

15. L 121: PM<sub>2.5</sub> is not chemical

We have changed “chemical” for “factors” in the revised text (L 124).

L 131: ...between HONO and other factors, such as PM<sub>2.5</sub>...

16. L 124: How systematic?

We have removed “This investigation of PM<sub>2.5</sub> and HONO is expected to clarify the sources, sinks, and reactions in fine PM pollution and the importance of systematic research.” We have added the sentences in the revised text.

L 133-147: The levels of PM<sub>2.5</sub> were divided into three periods to analyze the HONO sources, sinks, and reactions in different periods. Many papers (Huang et al., 2017; Tong et al., 2016) took PM<sub>2.5</sub> as the main control factor of HONO, and studied the differences of HONO sources and characteristics between clean and polluted periods. No homogeneous reaction, direct emission, heterogeneous

---

reaction, and daytime budget analysis were conducted during the period of worsening pollution (namely HD period in this paper). Total NO<sub>x</sub> emissions in cities with different leading factors of emissions have been declining year by year due to Chinese government emission control measures, but some Chinese cities are still in high-NO<sub>x</sub> areas (e.g. Beijing, Shanghai, Guangzhou and Zhengzhou.) (Kim et al., 2015; Liu et al., 2017). Under high-NO<sub>x</sub> conditions, some papers (Cui et al., 2018; Hou et al., 2016) suggested that heterogeneous reaction was the main source of HONO and did not conduct a quantitative analysis of homogeneous reaction, especially in winter. So, we explore relevant studies of homogeneous reactions. In addition, the source contributions of HONO at night varied with the degree of pollution level were not explained.

17. L 137: western Fourth-Ring Expressway

L 161: ...from the western Fourth-Ring Expressway of Zhengzhou City...

18. L 151: Use chemicals (in lieu of substances)

L 173: The chemicals that could be oxidized...

19. L 153: O<sub>2</sub> and N<sub>2</sub> (not O and N)

L 174: ...several gases (e.g., O<sub>2</sub> and N<sub>2</sub>)...

20. L 160-161: Clearly state which instrument is for which compound, e.g., 48i for CO measurement.

We have modified the sentence in the revised text.

---

L 181-184: A temporal resolution of the model analyzer (TE [used for measuring O<sub>3</sub>], 48i [used for measuring CO], 42i [used for measuring NO, NO<sub>x</sub>, and NO<sub>2</sub>], and TEOM 1405 PM<sub>2.5</sub> monitor [used for measuring PM<sub>2.5</sub>], Thermo Electron, USA) is 1 h.

21. L 167-168: The manual uses the term “should be”. But in your statement, you should use “was changed” ....”was calibrated”.

L 193: The standard curve should be...

L 190-191: ...were changed before the observation process, and the sampling flow was calibrated...

There are no serial **Numbers 22 and 23**. In order to prevent the confusion, the serial number used is consistent with the serial number in your comment.

24. L 171: A space after “≥” sign

L 194: ...the correlation coefficient ( $\geq 0.999$ )...

25. L 181: specify that it is daily average

L 203: ...the daily average of second grade...

26. Delete the first unit (L 182, 185, 188, 206, 301, 317, 360, etc.), first two units (L 301, 449, etc.)

L 205: ...0 to 4.2 m s<sup>-1</sup>...

L 208: ...0 to 4.6 m s<sup>-1</sup>...

---

L 210: ...0 to 3.5 m s<sup>-1</sup>...

L 230: ...0.2 to 14.8 ppbv...

L 340: ...2–52%, 6–34%, and 2–41%...

L 356: ...1.3 and 59.0%...

L 401: ...when RH reached a certain high level.

L 511: ...15, 14, and 28%...

27. L 189: .. north with high WS ... Also, how high is high? > 3 m/s, or > 4 m/s?

Be specific!

L 212: ...the maximum WS reached 4 m/s...

28. L 190: effect of pollutant removal

L 213: ...the effect of pollutant removal...

29. L 202: mean values of what? of all pollutant concentrations?

L 226: The mean values of all pollutant concentrations except O<sub>3</sub>...

30. L 209: Is your sampling site in urban area? You mentioned on the university campus. If so, the comparison is not valid.

OK. We have added the sampling site in Table 2. The university campus is urban in Zhengzhou. So, we compared the difference of the daytime and nighttime HONO level, HONO/NO<sub>2</sub>, and HONO/NO<sub>x</sub> mean values in urban in other cities.

**Table 2.**

Comparisons of the daytime and nighttime HONO level, HONO/NO<sub>2</sub>, and HONO/NO<sub>x</sub> mean values in Zhengzhou and other sites around the world.

| Date (Site) <sup>↙</sup>                                           | Instrument <sup>↙</sup>                                                        | HONO (ppbv) <sup>↙</sup> |                    |                  | HONO/NO <sub>2</sub> (%) <sup>↙</sup> |                    | HONO/NO <sub>x</sub> (%) <sup>↙</sup> |                    | Reference <sup>↙</sup>               |
|--------------------------------------------------------------------|--------------------------------------------------------------------------------|--------------------------|--------------------|------------------|---------------------------------------|--------------------|---------------------------------------|--------------------|--------------------------------------|
|                                                                    |                                                                                | Day <sup>↙</sup>         | Night <sup>↙</sup> | N/D <sup>↙</sup> | Day <sup>↙</sup>                      | Night <sup>↙</sup> | Day <sup>↙</sup>                      | Night <sup>↙</sup> |                                      |
| Oct.–Nov. 2014 <sup>↙</sup><br>(Beijing, urban) <sup>↙</sup>       | LOPAP <sup>↙</sup><br>(long path absorption<br>photometer) <sup>↙</sup>        | 0.9 <sup>↙</sup>         | 1.8 <sup>↙</sup>   | 2.0 <sup>↙</sup> | 2.6 <sup>↙</sup>                      | 4.6 <sup>↙</sup>   | 1.7 <sup>↙</sup>                      | 2.2 <sup>↙</sup>   | Tong et al., 2015 <sup>↙</sup>       |
|                                                                    |                                                                                | 1.8 <sup>↙</sup>         | 2.1 <sup>↙</sup>   | 1.2 <sup>↙</sup> | 3.8 <sup>↙</sup>                      | 4.3 <sup>↙</sup>   | 2.5 <sup>↙</sup>                      | 2.5 <sup>↙</sup>   |                                      |
| Feb.–Mar. 2014 <sup>↙</sup><br>(Beijing, urban) <sup>↙</sup>       | LOPAP <sup>↙</sup>                                                             |                          |                    |                  | (Severe haze) <sup>↙</sup>            |                    |                                       |                    | Hou et al., 2016 <sup>↙</sup>        |
|                                                                    |                                                                                | 0.5 <sup>↙</sup>         | 0.9 <sup>↙</sup>   | 1.8 <sup>↙</sup> | 7.8 <sup>↙</sup>                      | 3.0 <sup>↙</sup>   | 5.1 <sup>↙</sup>                      | 2.4 <sup>↙</sup>   |                                      |
|                                                                    |                                                                                |                          |                    |                  | (Clean) <sup>↙</sup>                  |                    |                                       |                    |                                      |
| Jul. 2006 <sup>↙</sup><br>(Guangzhou, rural) <sup>↙</sup>          | LOPAP <sup>↙</sup>                                                             | 0.2 <sup>↙</sup>         | 0.9 <sup>↙</sup>   | 4.5 <sup>↙</sup> | 1.0 <sup>↙</sup>                      | 2.5 <sup>↙</sup>   | 4.3 <sup>↙</sup>                      | 4.5 <sup>↙</sup>   | Li et al., 2012 <sup>↙</sup>         |
| Jul. 2014–Aug. 2015 <sup>↙</sup><br>(Xi'an, urban) <sup>↙</sup>    | LOPAP <sup>↙</sup>                                                             | 0.5 <sup>↙</sup>         | 1.6 <sup>↙</sup>   | 3.2 <sup>↙</sup> | 3.3 <sup>↙</sup>                      | 6.2 <sup>↙</sup>   | <sup>↙</sup>                          | <sup>↙</sup>       | Huang et al., 2017 <sup>↙</sup>      |
| Aug. 2010–Jun. 2012 <sup>↙</sup><br>(Shanghai, urban) <sup>↙</sup> | Active DOAS <sup>↙</sup>                                                       | 0.8 <sup>↙</sup>         | 1.1 <sup>↙</sup>   | 1.4 <sup>↙</sup> | 4.2 <sup>↙</sup>                      | 4.5 <sup>↙</sup>   | <sup>↙</sup>                          | <sup>↙</sup>       | Wang et al., 2013 <sup>↙</sup>       |
| Jul. 2009 <sup>↙</sup><br>(Paris, urban) <sup>↙</sup>              | wet-chemical derivatization<br>technique-HPLC/UV-VIS<br>detection <sup>↙</sup> | 0.1 <sup>↙</sup>         | 0.2 <sup>↙</sup>   | 2.0 <sup>↙</sup> | 3.3 <sup>↙</sup>                      | 2.5 <sup>↙</sup>   | <sup>↙</sup>                          | <sup>↙</sup>       | Michoud et al.,<br>2014 <sup>↙</sup> |
| Jan. 2019 <sup>↙</sup>                                             | AIM <sup>↙</sup>                                                               | 2.2 <sup>↙</sup>         | 2.8 <sup>↙</sup>   | 1.3 <sup>↙</sup> | 6.8 <sup>↙</sup>                      | 8.5 <sup>↙</sup>   | 4.4 <sup>↙</sup>                      | 5.5 <sup>↙</sup>   | This study <sup>↙</sup>              |

31. L 214: No logic about sunrise – previous max HONO values (8-10 am) are way past sunrise. Should have written after 10 am.....

L 240: After 10:00 LT, the HONO concentration...

32. L 215: reword the incomplete phrase

We have reworded the sentence in the revised text.

L 240-242: After 10:00 LT, the HONO concentration decreased because of the increased solubility and rapid photolysis, remaining at a low level before sunset (14:00–16:00 LT).

33. L 219: delete again

---

L 243-244: After sunset, the concentrations of NO and NO<sub>2</sub> began to increase and remained at a higher level than the daytime.

34. L 220: and the concentration remained the same (Is it true?!) until sunrise

It was not the same. The concentrations of NO and NO<sub>2</sub> began to increase and remained at a higher level than the daytime. We have modified the sentence in the revised text.

L 243-244: After sunset, the concentrations of NO and NO<sub>2</sub> began to increase and remained at a higher level than the daytime.

35. L 222: you meant NO<sub>2</sub> diffusion?

Sorry for my confusion. The concentrations of NO and NO<sub>2</sub> decreased after the peak values. On the one hand, NO and NO<sub>2</sub> can be involved in the reactions. On the other hand, NO and NO<sub>2</sub> diffused because of the boundary layer height increased in the daytime.

36. L 228: How is atmospheric migration? Should be “migration of atmospheric airmass”.

L 253: ...less affected by the migration of atmospheric airmass...

37. L 248: should be Eq. (1); Eq. (2) is in L 296.

L 277: ... $P_{\text{OH}+\text{NO}}^{\text{net}} = k_{\text{OH}+\text{NO}} [\text{OH}][\text{NO}] - k_{\text{OH}+\text{HONO}} [\text{OH}][\text{HONO}]$  (1).

---

38. L 249, 337, 338, 349, 389, etc.: A space b/a the = sign

L 278: At T = 298 K and P = 101 kPa...

L 377-378: ...PM<sub>2.5</sub> (R<sup>2</sup> = 0.23) was weaker than that between HONO and PM<sub>2.5</sub> (R<sup>2</sup> = 0.55)...

L 390-392: ...CO was relatively moderate (R<sup>2</sup> = 0.43)...

L 438: ...C<sub>HONO</sub> =  $\frac{([\text{HONO}]_{\text{correct}}]_{t_2} - [\text{HONO}]_{\text{correct}}]_{t_1}}{(t_2 - t_1) [\text{NO}_2]}$  (3)...

39. L 254: Adequate subscript in k<sub>OH+bar</sub>

L 289: ... the reaction rates of k<sub>OH+NO</sub>...

40. L 274: reword

L 311-312: With the increase in pollution level, the HONO accumulation period at nighttime increased.

41. L 279: Use rate (not level)

L 316: ...the hourly rate of HONO...

42. L 280: delete the extra spacing b/a the “/” sign

L 317-318: ...3.36 – 1.59 ppbv)/8 h).

43. L 307: on the campus

L 346: ...from the highway on the campus...

---

44. L 324: medium of what??

Sorry for my confusion. We have modified the sentence in the revised text.

L 361-364: With regard to the heterogeneous conversion of NO<sub>2</sub>, several studies (An et al., 2012; Shen and Zhang, 2013) have reported that the surface of soot particles is the medium of NO<sub>2</sub> conversion.

45. L 349-350: wording? cannot see “indicating ...of what most cases”? Why?

Sorry for my confusion. The correlation coefficient between HONO and CO was relatively moderate ( $R^2 = 0.43$ ), indicating that HONO and CO could come from the same source of emissions. Generally speaking, CO and NO are mainly related to combustion processes such as vehicle emissions, fossil fuel and biomass combustion (Tong et al., 2016). We have modified the sentence in the revised text.

L 390-396: The correlation coefficient between HONO and CO was relatively moderate ( $R^2 = 0.43$ ), indicating that HONO and CO could come from the same source of emissions. Generally speaking, CO and NO are mainly related to combustion processes such as vehicle emissions, fossil fuel and biomass combustion (Tong et al., 2016). Thus, fossil fuel and biomass combustion may contribute to HONO production, but they can not be measured directly.

46. L 361: sedimentation of what? Do you mean deposit?

Right. We have modified the sentence in the revised text.

L 406-408: When RH ranged at the middle level, the heterogeneous



---

conversion of NO<sub>2</sub> to HONO was more significant than that of deposition.

47. L 367: Delete “study of the”

L 414: The correlation between HONO<sub>correct</sub> and NO<sub>2</sub>...

48. L 374: decreases after...

L 421: ...heterogeneous reaction (R4), and NO<sub>2</sub> decreased after midnight.

49. L 383: in the (not then)

L 432: ...calculated in the current study...

50. L 396: How is rate improvement? Use increase

OK.

L 445: The increase in the conversion rate demonstrates...

51. L 402: The expression of .... represents

L 454: The expression of d HONO / d t represents...

52. L 411: delete an

L 471: ...·OH and NO were formed as R1.

53. Table 1: A space before (%), or HONO/NOX (%); before year, or Jun. 2012, Also add SD

**Table 2.**

Comparisons of the daytime and nighttime HONO level, HONO/NO<sub>2</sub>, and HONO/NO<sub>x</sub> mean values in Zhengzhou and other sites around the world.

| Date (Site) <sup>↵</sup>                                           | Instrument <sup>↵</sup>                                                        | HONO (ppbv) <sup>↵</sup> |                    |                  | HONO/NO <sub>2</sub> (%) <sup>↵</sup> |                    | HONO/NO <sub>x</sub> (%) <sup>↵</sup> |                    | Reference <sup>↵</sup>               |
|--------------------------------------------------------------------|--------------------------------------------------------------------------------|--------------------------|--------------------|------------------|---------------------------------------|--------------------|---------------------------------------|--------------------|--------------------------------------|
|                                                                    |                                                                                | Day <sup>↵</sup>         | Night <sup>↵</sup> | N/D <sup>↵</sup> | Day <sup>↵</sup>                      | Night <sup>↵</sup> | Day <sup>↵</sup>                      | Night <sup>↵</sup> |                                      |
| Oct.–Nov. 2014 <sup>↵</sup><br>(Beijing, urban) <sup>↵</sup>       | LOPAP <sup>↵</sup><br>(long path absorption<br>photometer) <sup>↵</sup>        | 0.9 <sup>↵</sup>         | 1.8 <sup>↵</sup>   | 2.0 <sup>↵</sup> | 2.6 <sup>↵</sup>                      | 4.6 <sup>↵</sup>   | 1.7 <sup>↵</sup>                      | 2.2 <sup>↵</sup>   | Tong et al., 2015 <sup>↵</sup>       |
|                                                                    |                                                                                | 1.8 <sup>↵</sup>         | 2.1 <sup>↵</sup>   | 1.2 <sup>↵</sup> | 3.8 <sup>↵</sup>                      | 4.3 <sup>↵</sup>   | 2.5 <sup>↵</sup>                      | 2.5 <sup>↵</sup>   |                                      |
| Feb.–Mar. 2014 <sup>↵</sup><br>(Beijing, urban) <sup>↵</sup>       | LOPAP <sup>↵</sup>                                                             | 0.5 <sup>↵</sup>         | 0.9 <sup>↵</sup>   | 1.8 <sup>↵</sup> | 7.8 <sup>↵</sup>                      | 3.0 <sup>↵</sup>   | 5.1 <sup>↵</sup>                      | 2.4 <sup>↵</sup>   | Hou et al., 2016 <sup>↵</sup>        |
|                                                                    |                                                                                |                          |                    |                  | (Severe haze) <sup>↵</sup>            |                    |                                       |                    |                                      |
| Jul. 2006 <sup>↵</sup><br>(Guangzhou, rural) <sup>↵</sup>          | LOPAP <sup>↵</sup>                                                             | 0.2 <sup>↵</sup>         | 0.9 <sup>↵</sup>   | 4.5 <sup>↵</sup> | 1.0 <sup>↵</sup>                      | 2.5 <sup>↵</sup>   | 4.3 <sup>↵</sup>                      | 4.5 <sup>↵</sup>   | Li et al., 2012 <sup>↵</sup>         |
| Jul. 2014–Aug. 2015 <sup>↵</sup><br>(Xi'an, urban) <sup>↵</sup>    | LOPAP <sup>↵</sup>                                                             | 0.5 <sup>↵</sup>         | 1.6 <sup>↵</sup>   | 3.2 <sup>↵</sup> | 3.3 <sup>↵</sup>                      | 6.2 <sup>↵</sup>   | ↵                                     | ↵                  | Huang et al., 2017 <sup>↵</sup>      |
| Aug. 2010–Jun. 2012 <sup>↵</sup><br>(Shanghai, urban) <sup>↵</sup> | Active DOAS <sup>↵</sup>                                                       | 0.8 <sup>↵</sup>         | 1.1 <sup>↵</sup>   | 1.4 <sup>↵</sup> | 4.2 <sup>↵</sup>                      | 4.5 <sup>↵</sup>   | ↵                                     | ↵                  | Wang et al., 2013 <sup>↵</sup>       |
| Jul. 2009 <sup>↵</sup><br>(Paris, urban) <sup>↵</sup>              | wet chemical derivatization<br>technique-HPLC/UV-VIS<br>detection <sup>↵</sup> | 0.1 <sup>↵</sup>         | 0.2 <sup>↵</sup>   | 2.0 <sup>↵</sup> | 3.3 <sup>↵</sup>                      | 2.5 <sup>↵</sup>   | ↵                                     | ↵                  | Michoud et al.,<br>2014 <sup>↵</sup> |
| Jan. 2019 <sup>↵</sup>                                             | AIM <sup>↵</sup>                                                               | 2.2 <sup>↵</sup>         | 2.8 <sup>↵</sup>   | 1.3 <sup>↵</sup> | 6.8 <sup>↵</sup>                      | 8.5 <sup>↵</sup>   | 4.4 <sup>↵</sup>                      | 5.5 <sup>↵</sup>   | This study <sup>↵</sup>              |

The values of SD were shown in the references.

54. Fig. 3: Need errors bars. Use the present tense, “represent”. Show one example in Box plots so one has an idea about the magnitude of variation.

55. Fig. 4: Need error bars

With too many error bars in figures, it will make the figures look unclear. So the error bars of **Fig. 4**, **Fig. 5**, and **Fig. 8** were placed separately in the tables of the supplement (**Table S2**, **Table S3**, and **Table S4**).

56. Fig. 6: A space after HONO

We have modified the figure in the revised text **Fig. 7**.

**Fig. 7.** Nighttime correlation studies between  $PM_{2.5}$  and  $HONO/NO_2$ ,  $PM_{2.5}$  and  $HONO$ ,  $CO$  and  $HONO$ ,  $RH$  and  $HONO/NO_2$  during the entire measurement period, CD, PD, and SPD periods. The blue represented the full measurement period; the light blue represented CD period; the black represented PD period; the red represented SPD period.

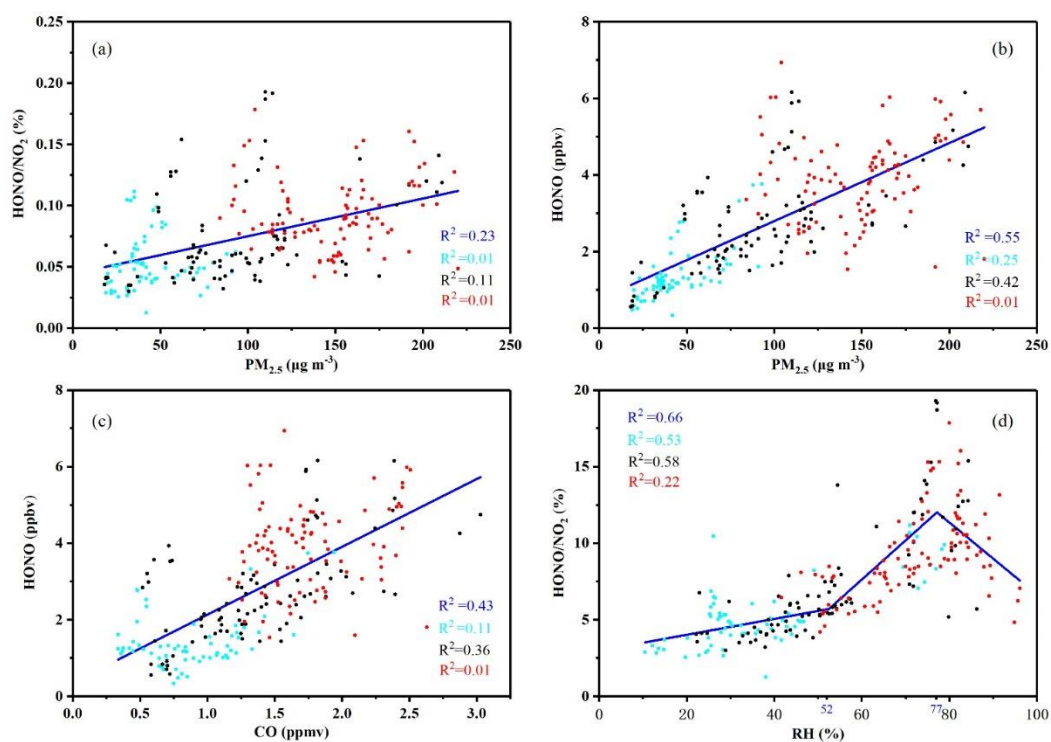

---

# Characteristics, sources, and reactions of nitrous acid during winter at an urban site in the Central Plains Economic Region in China

Qi Hao, Nan Jiang\*, Ruiqin Zhang, Liuming Yang, and Shengli Li

Key Laboratory of Environmental Chemistry and Low Carbon Technologies of Henan Province, Research Institute of Environmental Science, College of Chemistry, School of Ecology and Environment, Zhengzhou University, Zhengzhou 450001, China

## Supplement:

### 1. This AIM method and its details.

HONO was hygroscopically grown in the parallel plate denuder and collected as an aqueous solution in a cyclone assembly. The aqueous sample aliquots from both channels were transported to the ion chromatographic systems housed inside a ground container for hourly semicontinuous online analysis of HONO. The ion chromatographic system was calibrated for  $\text{NO}_2^-$  using mixed anion standard solutions of  $\text{NO}_2^-$ .

### 2. The concentration of OH radicals was calculated with the formulas of $\text{NO}_2$ , $\text{O}_3$ , and $\text{J}(\text{O}^1\text{D})$ .

$$[\text{OH}] = \frac{k_{\text{HO}_2+\text{NO}}\tau_{\text{HC}}[\text{NO}_2]F_{\text{J}}}{k_{\text{NO}+\text{O}_3}} \times \sqrt{\frac{\alpha}{k_{\text{HO}_2+\text{HO}_2}[\text{O}_3]}} \times J(\text{O}^1\text{D}),$$

where  $[\text{OH}]$  represents the concentration of OH radicals,  $k_{\text{HO}_2+\text{NO}} = 8.56 \times 10^{-12} \text{ cm}^3 \text{ s}^{-1}$ ,  $\tau_{\text{HC}} = 0.3 \text{ s}$ ,  $[\text{NO}_2]$  represents the  $\text{NO}_2$  concentration,  $F_{\text{J}} = 2 \text{ s}^{-0.5}$ ,  $k_{\text{NO}+\text{O}_3} = 1.82 \times 10^{-14} \text{ cm}^3 \text{ s}^{-1}$ ,  $\alpha = 0.075$ ,  $k_{\text{HO}_2+\text{HO}_2} = 8.56 \times 10^{-12} \text{ cm}^3 \text{ s}^{-1}$ ,  $[\text{O}_3]$  represents the  $\text{O}_3$  concentration, and  $J(\text{O}^1\text{D})$  represents the  $\text{O}^1\text{D}$  efficiency of photolysis.

---

**Figure Captions:**

Fig. S1. The correlation study between  $\text{HONO}_{\text{correct}}$  and  $\text{NO}_2$  in the nighttime.

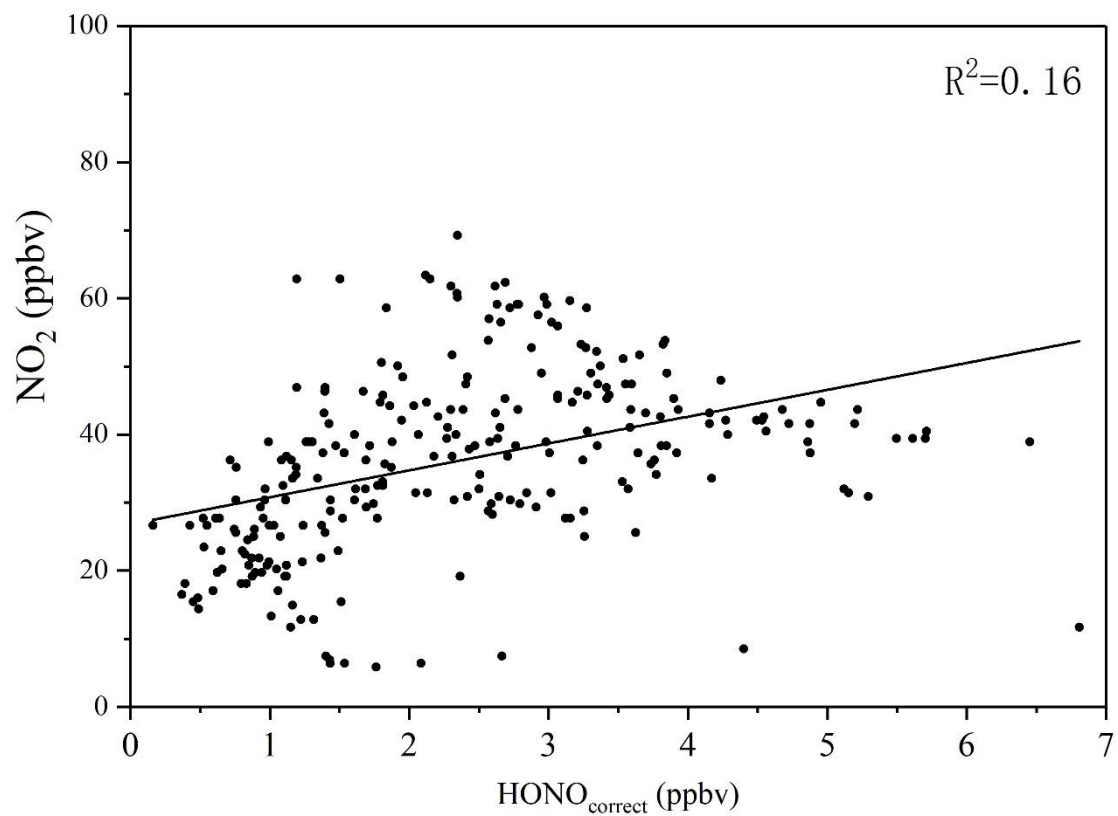

**Fig. S1.** The correlation study between HONO<sub>correct</sub> and NO<sub>2</sub> in the nighttime.

---

**Table Captions:**

Table S1. Measured species and performance of the instruments.

Table S2 The error bars of Fig. 4. (The units of all species except HONO/NO<sub>2</sub> and HONO/NO<sub>x</sub> are ppbv. The units of HONO/NO<sub>2</sub> and HONO/NO<sub>x</sub> are %.)

Table S3 The error bars of Fig. 5. (The units of all species except  $P_{\text{OH+NO}}^{\text{net}}$  are ppbv. The unit of  $P_{\text{OH+NO}}^{\text{net}}$  is ppbv/h.)

Table S4 The error bars of Fig. 8. (The units of all species except HONO<sub>correct</sub>/NO<sub>2</sub> are ppbv. The unit of HONO<sub>correct</sub>/NO<sub>2</sub> is %.)

---

**Table S1.** Measured species and performance of the instruments.

| Species           | Measurement technique                    | Detection limit          | Accuracy   |
|-------------------|------------------------------------------|--------------------------|------------|
| PM <sub>2.5</sub> | Tapered Element Oscillating Microbalance | 1.5 $\mu\text{g m}^{-3}$ | $\pm 5\%$  |
| HONO              | Ion Chromatography                       | 4 pptv                   | $\pm 20\%$ |
| CO                | Absorbs Infrared Radiation               | 40 ppbv                  | $\pm 5\%$  |
| NO                | Chemiluminescence                        | 60 pptv                  | $\pm 20\%$ |
| NO <sub>2</sub>   | Chemiluminescence                        | 300 pptv                 | $\pm 20\%$ |
| O <sub>3</sub>    | UV Photometry                            | 0.5 ppbv                 | $\pm 5\%$  |

The results came from instrument manufacturers.



**Table S2-1** The error bars of Fig. 4. (The units of all species except HONO/NO<sub>2</sub> and HONO/NO<sub>x</sub> are ppbv. The units of HONO/NO<sub>2</sub> and HONO/NO<sub>x</sub> are %.)

| Species-period            | Local Time (hh:mm) |             |             |             |             |           |            |           |           |           |
|---------------------------|--------------------|-------------|-------------|-------------|-------------|-----------|------------|-----------|-----------|-----------|
|                           | 00:00              | 01:00       | 02:00       | 03:00       | 04:00       | 05:00     | 06:00      | 07:00     | 08:00     | 09:00     |
| HONO-CD                   | 1.7 ± 1.3          | 1.4 ± 0.6   | 1.3 ± 0.4   | 1.2 ± 0.3   | 1.2 ± 0.2   | 1.2 ± 0.2 | 1.4 ± 0.3  | 1.5 ± 0.6 | 1.7 ± 0.9 | 1.6 ± 0.9 |
| HONO-PD                   | 3.2 ± 1.5          | 3.1 ± 1.3   | 3 ± 1.1     | 3.3 ± 1.2   | 3.5 ± 1.3   | 3.5 ± 1.2 | 3.6 ± 1.1  | 3.3 ± 0.9 | 3.7 ± 1.6 | 4.1 ± 2.8 |
| HONO-SPD                  | 3.7 ± 0.9          | 4 ± 0.8     | 4.2 ± 0.6   | 4.4 ± 0.8   | 4.6 ± 1     | 4.6 ± 1.2 | 4.6 ± 1.5  | 4.4 ± 1.3 | 4.4 ± 1.1 | 5.7 ± 3   |
| NO-CD                     | 14.3 ± 17          | 9 ± 9.7     | 8.5 ± 12.7  | 10.1 ± 22.4 | 10.6 ± 21.1 | 21.9 ± 29 | 27.8 ± 33  | 40.1 ± 51 | 52.6 ± 79 | 55.5 ± 84 |
| NO-PD                     | 57.3 ± 48          | 62.7 ± 55.9 | 49.6 ± 49   | 44 ± 47.8   | 47 ± 48.7   | 46.6 ± 30 | 41.4 ± 34  | 44.7 ± 33 | 48.9 ± 35 | 53.7 ± 44 |
| NO-SPD                    | 79.4 ± 103         | 100.1 ± 118 | 128.3 ± 133 | 129 ± 134   | 111 ± 119   | 117 ± 95  | 100 ± 94   | 88.4 ± 85 | 82.3 ± 70 | 85.4 ± 71 |
| NO <sub>2</sub> -CD       | 25.4 ± 8.2         | 25.6 ± 9.9  | 24.7 ± 10.5 | 22.9 ± 10.4 | 24 ± 11.4   | 20.7 ± 11 | 20.2 ± 9   | 23.6 ± 11 | 28.6 ± 18 | 28.6 ± 18 |
| NO <sub>2</sub> -PD       | 41.1 ± 10          | 40.8 ± 11.2 | 39.7 ± 10.7 | 37.9 ± 7.1  | 36.6 ± 5.4  | 35.9 ± 5  | 33.8 ± 6   | 34.4 ± 6  | 33.2 ± 5  | 30.7 ± 6  |
| NO <sub>2</sub> -SPD      | 45.3 ± 9.5         | 43.5 ± 9.2  | 42.8 ± 8.8  | 42.1 ± 8.2  | 42.2 ± 8.1  | 41 ± 7.1  | 40.6 ± 6.9 | 40.7 ± 6  | 40.1 ± 6  | 39.2 ± 7  |
| O <sub>3</sub> -CD        | 14.2 ± 10          | 13.6 ± 10.4 | 14.2 ± 10.1 | 14.9 ± 9.4  | 13.6 ± 9.1  | 11.7 ± 10 | 13.8 ± 10  | 12.9 ± 9  | 11.6 ± 8  | 12.1 ± 7  |
| O <sub>3</sub> -PD        | 6.6 ± 6.1          | 6.4 ± 5.2   | 7.1 ± 5.2   | 6.3 ± 3.3   | 4.7 ± 2.2   | 5.3 ± 3   | 7.7 ± 6.9  | 5.3 ± 2.8 | 5.5 ± 3   | 7.1 ± 4   |
| O <sub>3</sub> -SPD       | 7.8 ± 6.4          | 7.7 ± 6.2   | 7.3 ± 5     | 6 ± 2.9     | 5.3 ± 2.3   | 5 ± 2.1   | 5.6 ± 2.5  | 5.2 ± 2.2 | 5.6 ± 2.6 | 6 ± 2.6   |
| HONO/NO <sub>2</sub> -CD  | 3.8 ± 1.5          | 4.4 ± 1     | 4.4 ± 1.1   | 4.9 ± 1     | 5.1 ± 0.8   | 8.3 ± 6   | 6.9 ± 2.1  | 6.2 ± 1.4 | 5.1 ± 0.8 | 4.3 ± 1.1 |
| HONO/NO <sub>2</sub> -PD  | 8 ± 3.6            | 7.8 ± 3.4   | 8 ± 3.3     | 9 ± 3.7     | 10 ± 4.5    | 10.1 ± 4  | 11.2 ± 4.6 | 10.3 ± 4  | 12.1 ± 7  | 14.3 ± 11 |
| HONO/NO <sub>2</sub> -SPD | 8.3 ± 1.9          | 9.3 ± 1.4   | 10 ± 1.5    | 10.7 ± 1.9  | 11 ± 2.2    | 11.3 ± 3  | 11.5 ± 3.9 | 10.9 ± 3  | 11.1 ± 2  | 15 ± 8.3  |
| HONO/NO <sub>x</sub> -CD  | 2.7 ± 1.4          | 3.7 ± 1.5   | 4.2 ± 1.4   | 4.9 ± 1.1   | 4.9 ± 1     | 5.3 ± 2.5 | 5.1 ± 2.9  | 4.5 ± 2.4 | 3.6 ± 1.5 | 2.8 ± 1.4 |
| HONO/NO <sub>x</sub> -PD  | 4.4 ± 1.4          | 4.3 ± 1.7   | 4.6 ± 1.5   | 5.3 ± 1.3   | 5.3 ± 1     | 5.3 ± 1.1 | 6.6 ± 2.7  | 5.9 ± 2.3 | 6.5 ± 3.8 | 6.6 ± 4.3 |
| HONO/NO <sub>x</sub> -SPD | 5.1 ± 2            | 5.3 ± 2.4   | 5.4 ± 3.4   | 5.8 ± 3.9   | 6.1 ± 3.9   | 5.7 ± 3.7 | 5.9 ± 3.6  | 5.7 ± 3   | 5.8 ± 2.9 | 6.7 ± 3.1 |

**Table S2-2** The error bars of Fig. 4. (The units of all species except HONO/NO<sub>2</sub> and HONO/NO<sub>x</sub> are ppbv. The units of HONO/NO<sub>2</sub> and HONO/NO<sub>x</sub> are %.)

| Species-period            | Local Time (hh:mm) |             |             |             |             |           |            |           |            |            |
|---------------------------|--------------------|-------------|-------------|-------------|-------------|-----------|------------|-----------|------------|------------|
|                           | 10:00              | 11:00       | 12:00       | 13:00       | 14:00       | 15:00     | 16:00      | 17:00     | 18:00      | 19:00      |
| HONO-CD                   | 1.1 ± 0.6          | 0.6 ± 0.3   | 0.5 ± 0.3   | 0.6 ± 0.4   | 0.6 ± 0.5   | 0.7 ± 0.5 | 0.6 ± 0.5  | 0.7 ± 0.4 | 1 ± 0.5    | 1.2 ± 0.5  |
| HONO-PD                   | 2.9 ± 1.9          | 1.9 ± 1.3   | 1.3 ± 0.7   | 1 ± 0.3     | 0.9 ± 0.3   | 0.9 ± 0.3 | 0.9 ± 0.3  | 1.1 ± 0.4 | 1.4 ± 0.3  | 1.7 ± 0.3  |
| HONO-SPD                  | 6.9 ± 4.3          | 5.2 ± 3.8   | 3 ± 1.3     | 2.1 ± 0.7   | 1.8 ± 0.7   | 1.7 ± 0.6 | 1.8 ± 0.7  | 2 ± 0.5   | 2.7 ± 0.7  | 2.8 ± 0.8  |
| NO-CD                     | 43.9 ± 69.8        | 27.9 ± 40.8 | 14.9 ± 17.1 | 10.3 ± 7.8  | 7.3 ± 3     | 6 ± 4.5   | 6.4 ± 5.6  | 3.6 ± 3.4 | 2.6 ± 3.2  | 5.9 ± 7.7  |
| NO-PD                     | 49.3 ± 45.2        | 30 ± 26.2   | 21 ± 20.7   | 12.7 ± 14.7 | 9.4 ± 12.3  | 8.4 ± 9.5 | 5.7 ± 4.7  | 6.3 ± 6.8 | 9 ± 9      | 10 ± 10.3  |
| NO-SPD                    | 90.8 ± 73.4        | 79.3 ± 69.3 | 57.1 ± 52.3 | 34.8 ± 36.4 | 24.5 ± 28.7 | 19 ± 24.7 | 15 ± 18.8  | 11.8 ± 11 | 11.8 ± 7.9 | 22.4 ± 21  |
| NO <sub>2</sub> -CD       | 26.8 ± 15.7        | 22.7 ± 9.2  | 17.6 ± 7.1  | 17.1 ± 9    | 19.6 ± 9.6  | 21 ± 10.7 | 20.5 ± 9   | 21.4 ± 9  | 26 ± 12.5  | 30 ± 13.7  |
| NO <sub>2</sub> -PD       | 30 ± 6.9           | 28.8 ± 7.7  | 27.4 ± 9.6  | 24.8 ± 9.4  | 22.5 ± 10.6 | 25 ± 9.9  | 25.7 ± 9.3 | 27.1 ± 9  | 35 ± 8.7   | 36.2 ± 9.2 |
| NO <sub>2</sub> -SPD      | 39.8 ± 7.8         | 41.5 ± 8.3  | 42.3 ± 10.1 | 39.5 ± 12.6 | 38.5 ± 14.3 | 38 ± 14.7 | 38 ± 13.9  | 42 ± 15.4 | 45 ± 11.5  | 47 ± 10.8  |
| O <sub>3</sub> -CD        | 15.9 ± 8.8         | 19.5 ± 9.7  | 22.6 ± 8.3  | 25.5 ± 8.5  | 28.1 ± 9.1  | 29 ± 10.8 | 28 ± 10.8  | 29 ± 10.2 | 23.6 ± 10  | 17 ± 8.9   |
| O <sub>3</sub> -PD        | 9.6 ± 6.1          | 12.8 ± 6.2  | 18.7 ± 8.3  | 24.1 ± 8.4  | 28.2 ± 9.7  | 27 ± 10.8 | 28 ± 10.4  | 26 ± 10.5 | 17.4 ± 8.6 | 15 ± 11.6  |
| O <sub>3</sub> -SPD       | 6.3 ± 2.4          | 8.7 ± 4.5   | 12.8 ± 8.5  | 19.4 ± 12.9 | 24.1 ± 14.7 | 28 ± 16.6 | 29 ± 17.6  | 25 ± 16.1 | 17 ± 11.1  | 10.6 ± 9.7 |
| HONO/NO <sub>2</sub> -CD  | 4.1 ± 2.3          | 3.1 ± 1.9   | 3.3 ± 1.9   | 3.3 ± 1.3   | 3.1 ± 1.3   | 3.1 ± 1.3 | 2.9 ± 1.4  | 3.1 ± 1.4 | 3.9 ± 1.4  | 4.5 ± 2.2  |
| HONO/NO <sub>2</sub> -PD  | 9.4 ± 5.6          | 6.2 ± 3     | 4.7 ± 1.5   | 4.2 ± 1.2   | 4.7 ± 2.2   | 3.9 ± 0.7 | 3.7 ± 0.4  | 4.1 ± 1.2 | 4.3 ± 0.9  | 5 ± 1.5    |
| HONO/NO <sub>2</sub> -SPD | 18.9 ± 13.7        | 13.7 ± 12   | 7.3 ± 3.5   | 5.6 ± 2.6   | 4.9 ± 2.1   | 4.8 ± 2.4 | 4.9 ± 1.6  | 5 ± 1     | 6.3 ± 1.8  | 6.2 ± 1.5  |
| HONO/NO <sub>x</sub> -CD  | 2.9 ± 2.1          | 2.2 ± 1.5   | 2.4 ± 1.5   | 2.5 ± 1.1   | 2.5 ± 1     | 2.6 ± 0.9 | 2.5 ± 0.9  | 2.8 ± 1   | 3.7 ± 1.1  | 4.1 ± 1.9  |
| HONO/NO <sub>x</sub> -PD  | 4.8 ± 2.4          | 3.8 ± 1.3   | 3.5 ± 1.2   | 3.5 ± 1.5   | 4 ± 2.1     | 3.4 ± 0.9 | 3.3 ± 0.5  | 3.7 ± 1.2 | 3.8 ± 0.7  | 4.3 ± 1.5  |
| HONO/NO <sub>x</sub> -SPD | 8.2 ± 5.8          | 6.9 ± 5.7   | 4.3 ± 2     | 4 ± 2       | 3.8 ± 1.6   | 3.9 ± 1.9 | 4.3 ± 1.6  | 4.5 ± 1.2 | 5.5 ± 1.5  | 4.9 ± 1.3  |

**Table S2-3** The error bars of Fig. 4. (The units of all species except HONO/NO<sub>2</sub> and HONO/NO<sub>x</sub> are ppbv. The units of HONO/NO<sub>2</sub> and HONO/NO<sub>x</sub> are %.)

| Species-period            | Local Time (hh:mm) |             |             |             |
|---------------------------|--------------------|-------------|-------------|-------------|
|                           | 20:00              | 21:00       | 22:00       | 23:00       |
| HONO-CD                   | 1.3 ± 0.6          | 1.6 ± 0.9   | 2 ± 0.9     | 2.1 ± 0.9   |
| HONO-PD                   | 1.7 ± 0.7          | 1.8 ± 0.8   | 2 ± 0.9     | 2.1 ± 0.9   |
| HONO-SPD                  | 3.1 ± 0.9          | 3.2 ± 0.9   | 3.7 ± 0.8   | 4.6 ± 1.2   |
| NO-CD                     | 11.1 ± 16.9        | 14.5 ± 22.5 | 35.5 ± 68.9 | 50.8 ± 99.2 |
| NO-PD                     | 15 ± 14.1          | 15.3 ± 14.7 | 27.4 ± 28.5 | 33.9 ± 28.9 |
| NO-SPD                    | 29.4 ± 24.2        | 37.3 ± 26.6 | 38.5 ± 23.1 | 51.4 ± 31.4 |
| NO <sub>2</sub> -CD       | 31 ± 13.8          | 30.3 ± 14.5 | 31.6 ± 13.6 | 31 ± 14.3   |
| NO <sub>2</sub> -PD       | 37.3 ± 10.5        | 38.5 ± 13.9 | 38.3 ± 13.5 | 37.1 ± 13.2 |
| NO <sub>2</sub> -SPD      | 44.5 ± 11          | 43.5 ± 11.5 | 43.5 ± 11.1 | 42.1 ± 13.1 |
| O <sub>3</sub> -CD        | 13.3 ± 10.1        | 14 ± 11     | 12.2 ± 8.7  | 12.7 ± 8.8  |
| O <sub>3</sub> -PD        | 13.7 ± 10.3        | 10.9 ± 8.5  | 10.9 ± 7.7  | 12.2 ± 10.4 |
| O <sub>3</sub> -SPD       | 9.9 ± 8.6          | 10.8 ± 9.2  | 9.7 ± 8.7   | 9.6 ± 9.6   |
| HONO/NO <sub>2</sub> -CD  | 4.6 ± 2.2          | 5.7 ± 2.6   | 6.5 ± 2.6   | 6.8 ± 2.7   |
| HONO/NO <sub>2</sub> -PD  | 4.7 ± 1.9          | 4.6 ± 1.2   | 4.9 ± 0.8   | 5.3 ± 0.8   |
| HONO/NO <sub>2</sub> -SPD | 7 ± 1.5            | 7.5 ± 1.4   | 8.9 ± 2.3   | 9.4 ± 2.4   |
| HONO/NO <sub>x</sub> -CD  | 4 ± 1.9            | 4.8 ± 2.2   | 4.9 ± 2.8   | 5 ± 3       |
| HONO/NO <sub>x</sub> -PD  | 3.9 ± 2.1          | 3.9 ± 1.3   | 3.8 ± 1     | 3.8 ± 0.9   |
| HONO/NO <sub>x</sub> -SPD | 5.1 ± 1.5          | 5.2 ± 2     | 5.8 ± 2     | 5 ± 1.4     |

**Table S3-1** The error bars of Fig. 5. (The units of all species except  $P_{\text{OH+NO}}^{\text{net}}$  are ppbv. The unit of  $P_{\text{OH+NO}}^{\text{net}}$  is ppbv/h.)

| Species-period                       | Local Time (hh:mm) |                 |                 |                 |                 |                 |                 |                 |                |                |
|--------------------------------------|--------------------|-----------------|-----------------|-----------------|-----------------|-----------------|-----------------|-----------------|----------------|----------------|
|                                      | 19:00              | 20:00           | 21:00           | 22:00           | 23:00           | 00:00           | 01:00           | 02:00           | 03:00          | 04:00          |
| $P_{\text{OH+NO}}^{\text{net}}$ -CD  | $0.04 \pm 0.06$    | $0.08 \pm 0.12$ | $0.11 \pm 0.17$ | $0.33 \pm 0.54$ | $0.47 \pm 0.79$ | $0.12 \pm 0.13$ | $0.07 \pm 0.08$ | $0.03 \pm 0.03$ | $0.01 \pm 0.1$ | $0.02 \pm 0.1$ |
| HONO-CD                              | $1.18 \pm 0.48$    | $1.32 \pm 0.62$ | $1.62 \pm 0.9$  | $2.02 \pm 0.94$ | $2.09 \pm 0.9$  | $1.67 \pm 1.34$ | $1.43 \pm 0.63$ | $1.26 \pm 0.44$ | $1.2 \pm 0.3$  | $1.2 \pm 0.22$ |
| NO-CD                                | $5.4 \pm 6.5$      | $10.2 \pm 14.4$ | $13.3 \pm 19.2$ | $38.2 \pm 62.2$ | $54.9 \pm 89.7$ | $15 \pm 14.8$   | $8.8 \pm 8.6$   | $3.7 \pm 4.2$   | $1.5 \pm 2.3$  | $2.5 \pm 2.6$  |
| $P_{\text{OH+NO}}^{\text{net}}$ -HD  | $0.07 \pm 0.07$    | $0.1 \pm 0.1$   | $0.1 \pm 0.1$   | $0.19 \pm 0.2$  | $0.23 \pm 0.2$  | $0.4 \pm 0.34$  | $0.44 \pm 0.4$  | $0.34 \pm 0.35$ | $0.3 \pm 0.34$ | $0.3 \pm 0.34$ |
| HONO-HD                              | $1.7 \pm 0.27$     | $1.71 \pm 0.68$ | $1.82 \pm 0.78$ | $1.98 \pm 0.89$ | $2.06 \pm 0.93$ | $3.21 \pm 1.54$ | $3.05 \pm 1.27$ | $3.01 \pm 1.08$ | $3.3 \pm 1.17$ | $3.5 \pm 1.34$ |
| NO-HD                                | $8.5 \pm 8.4$      | $12.2 \pm 11.5$ | $12.5 \pm 12$   | $22.4 \pm 23.3$ | $27.7 \pm 23.6$ | $46.8 \pm 39.5$ | $51.2 \pm 45.6$ | $40.5 \pm 40$   | $35.9 \pm 39$  | $38 \pm 39.7$  |
| $P_{\text{OH+NO}}^{\text{net}}$ -SHD | $0.15 \pm 0.15$    | $0.2 \pm 0.17$  | $0.25 \pm 0.18$ | $0.26 \pm 0.16$ | $0.35 \pm 0.23$ | $0.55 \pm 0.75$ | $0.7 \pm 0.85$  | $0.9 \pm 0.96$  | $0.9 \pm 1.0$  | $0.8 \pm 0.86$ |
| HONO-SHD                             | $2.8 \pm 0.8$      | $3.1 \pm 0.9$   | $3.2 \pm 0.9$   | $3.7 \pm 0.8$   | $4.6 \pm 1.2$   | $3.7 \pm 0.9$   | $4 \pm 0.8$     | $4.2 \pm 0.6$   | $4.4 \pm 0.8$  | $4.6 \pm 1$    |
| NO-SHD                               | $18 \pm 17$        | $24 \pm 20$     | $30 \pm 21$     | $31 \pm 19$     | $42 \pm 25$     | $64 \pm 84$     | $81 \pm 96$     | $104 \pm 108$   | $105 \pm 110$  | $90 \pm 97$    |

**Table S3-2** The error bars of Fig. 5. (The units of all species except  $P_{\text{OH+NO}}^{\text{net}}$  are ppbv. The unit of  $P_{\text{OH+NO}}^{\text{net}}$  is ppbv/h.)

| Species-period                       | Local Time (hh:mm) |                 |
|--------------------------------------|--------------------|-----------------|
|                                      | 05:00              | 06:00           |
| $P_{\text{OH+NO}}^{\text{net}}$ -CD  | $0.12 \pm 0.18$    | $0.17 \pm 0.22$ |
| HONO-CD                              | $1.25 \pm 0.21$    | $1.36 \pm 0.35$ |
| NO-CD                                | $13.7 \pm 20.9$    | $19.5 \pm 25.1$ |
| $P_{\text{OH+NO}}^{\text{net}}$ -HD  | $0.32 \pm 0.22$    | $0.28 \pm 0.25$ |
| HONO-HD                              | $3.5 \pm 1.16$     | $3.56 \pm 1.09$ |
| NO-HD                                | $38 \pm 25.2$      | $33.8 \pm 28.5$ |
| $P_{\text{OH+NO}}^{\text{net}}$ -SHD | $0.82 \pm 0.87$    | $0.7 \pm 0.68$  |
| HONO-SHD                             | $4.6 \pm 1.2$      | $4.6 \pm 1.5$   |
| NO-SHD                               | $95.6 \pm 99$      | $81.8 \pm 77.1$ |

**Table S4-1** The error bars of Fig. 8. (The units of all species except HONO<sub>correct</sub>/NO<sub>2</sub> are ppbv. The unit of HONO<sub>correct</sub>/NO<sub>2</sub> is %.)

| Species-period                                | Local Time (hh:mm) |           |           |           |             |           |           |            |           |           |
|-----------------------------------------------|--------------------|-----------|-----------|-----------|-------------|-----------|-----------|------------|-----------|-----------|
|                                               | 19:00              | 20:00     | 21:00     | 22:00     | 23:00       | 00:00     | 01:00     | 02:00      | 03:00     | 04:00     |
| HONO <sub>correct</sub> -CD                   | 1.0 ± 0.4          | 1.1 ± 0.6 | 1.4 ± 0.8 | 1.6 ± 0.7 | 1.6 ± 0.6   | 1.4 ± 1.4 | 1.2 ± 0.7 | 1.1 ± 0.5  | 1.1 ± 0.4 | 1.1 ± 0.2 |
| NO <sub>2</sub> -CD                           | 30 ± 15            | 31 ± 15   | 30 ± 15   | 34 ± 15   | 34 ± 15     | 25 ± 9    | 24 ± 8    | 22 ± 8     | 20 ± 8    | 20 ± 8    |
| HONO <sub>correct</sub> /NO <sub>2</sub> -CD  | 3.7 ± 2.2          | 3.9 ± 2.2 | 4.9 ± 2.6 | 5.5 ± 2.7 | 5.7 ± 2.9   | 11 ± 18.2 | 8.9 ± 12  | 8.6 ± 10.8 | 8.5 ± 9.7 | 7.7 ± 7.4 |
| HONO <sub>correct</sub> -HD                   | 1.4 ± 0.3          | 1.4 ± 0.7 | 1.5 ± 0.7 | 1.6 ± 0.8 | 1.7 ± 0.8   | 2.7 ± 1.3 | 2.5 ± 1   | 2.5 ± 0.8  | 2.9 ± 0.9 | 3.1 ± 1.1 |
| NO <sub>2</sub> -HD                           | 36 ± 9             | 37 ± 10   | 39 ± 14   | 38 ± 13   | 37 ± 13     | 41 ± 10   | 41 ± 11   | 40 ± 11    | 38 ± 7    | 37 ± 5    |
| HONO <sub>correct</sub> /NO <sub>2</sub> -HD  | 4.2 ± 1.5          | 3.8 ± 2   | 3.8 ± 1.2 | 4 ± 0.8   | 4.4 ± 0.7   | 6.7 ± 3.1 | 6.5 ± 2.8 | 6.7 ± 2.8  | 7.8 ± 3.1 | 8.7 ± 3.8 |
| HONO <sub>correct</sub> -SHD                  | 2.4 ± 0.6          | 2.6 ± 0.7 | 2.7 ± 0.7 | 3.2 ± 0.7 | 4.1 ± 1.3   | 3.1 ± 0.8 | 3.3 ± 0.6 | 3.4 ± 0.7  | 3.6 ± 1   | 3.9 ± 1.1 |
| NO <sub>2</sub> -SHD                          | 47 ± 11            | 44 ± 11   | 43 ± 11   | 44 ± 11   | 42 ± 13     | 45 ± 9    | 43 ± 9    | 43 ± 9     | 42 ± 8    | 42 ± 8    |
| HONO <sub>correct</sub> /NO <sub>2</sub> -SHD | 5.4 ± 1.4          | 6.1 ± 1.4 | 6.5 ± 1.4 | 7.8 ± 2.2 | 14.4 ± 16.7 | 7 ± 1.9   | 7.8 ± 1.6 | 8.1 ± 2.2  | 8.8 ± 2.8 | 9.3 ± 2.9 |

**Table S4-2** The error bars of Fig. 8. (The units of all species except HONO<sub>correct</sub>/NO<sub>2</sub> are ppbv. The unit of HONO<sub>correct</sub>/NO<sub>2</sub> is %.)

| Species-period                                | Local Time (hh:mm) |           |
|-----------------------------------------------|--------------------|-----------|
|                                               | 05:00              | 06:00     |
| HONO <sub>correct</sub> -CD                   | 1.0 ± 0.4          | 1.1 ± 0.6 |
| NO <sub>2</sub> -CD                           | 30 ± 15            | 31 ± 15   |
| HONO <sub>correct</sub> /NO <sub>2</sub> -CD  | 3.7 ± 2.2          | 3.9 ± 2.2 |
| HONO <sub>correct</sub> -HD                   | 1.4 ± 0.3          | 1.4 ± 0.7 |
| NO <sub>2</sub> -HD                           | 36 ± 9             | 37 ± 10   |
| HONO <sub>correct</sub> /NO <sub>2</sub> -HD  | 4.2 ± 1.5          | 3.8 ± 2   |
| HONO <sub>correct</sub> -SHD                  | 2.4 ± 0.6          | 2.6 ± 0.7 |
| NO <sub>2</sub> -SHD                          | 47 ± 11            | 44 ± 11   |
| HONO <sub>correct</sub> /NO <sub>2</sub> -SHD | 5.4 ± 1.4          | 6.1 ± 1.4 |

---

## Reference

- An, J., Li, Y., Chen, Y., Li, J., Qu, Y., and Tang, Y.: Enhancements of major aerosol components due to additional HONO sources in the North China Plain and implications for visibility and haze, *Adv. Atmos. Sci.*, 30, 57-66, <https://doi.org/10.1007/s00376-012-2016-9>, 2012.
- Atkinson, R., Baulch, D. L., Cox, R. A., Crowley, J. N., Hampson, R. F., Hynes, R. G., Jenkin, M. E., Rossi, M. J., and Troe, J.: Evaluated kinetic and photochemical data for atmospheric chemistry: Volume I - gas phase reactions of O<sub>x</sub>, HO<sub>x</sub>, NO<sub>x</sub> and SO<sub>x</sub> species, *Atmos. Chem. Phys.*, 4, 1461-1738, <https://doi.org/10.5194/acp-4-1461-2004>, 2004.
- Cui, L., Li, R., Zhang, Y., Meng, Y., Fu, H., and Chen, J.: An observational study of nitrous acid (HONO) in Shanghai, China: The aerosol impact on HONO formation during the haze episodes, *Sci. Total Environ.*, 630, 1057-1070, <https://doi.org/10.1016/j.scitotenv.2018.02.063>, 2018.
- Finlayson-Pitts, B. J., Wingen, L. M., Sumner, A. L., Syomin, D., and Ramazan, K. A.: The heterogeneous hydrolysis of NO<sub>2</sub> in laboratory systems and in outdoor and indoor atmospheres: An integrated mechanism, *PCCP*, 5, 223-242, <https://doi.org/10.1039/b208564j>, 2003.
- Hou, S., Tong, S., Ge, M., and An, J.: Comparison of atmospheric nitrous acid during severe haze and clean periods in Beijing, China, *Atmos. Environ.*, 124, 199-206, <https://doi.org/10.1016/j.atmosenv.2015.06.023>, 2016.
- Huang, R. J., Yang, L., Cao, J., Wang, Q., Tie, X., Ho, K. F., Shen, Z., Zhang, R., Li, G., Zhu, C., Zhang, N., Dai, W., Zhou, J., Liu, S., Chen, Y., Chen, J., and O'Dowd, C. D.: Concentration and sources of atmospheric nitrous acid (HONO) at an urban site in Western China, *Sci. Total Environ.*, 593-594, 165-172, <https://doi.org/10.1016/j.scitotenv.2017.02.166>, 2017.
- Jiang, N., Dong, Z., Xu, Y., Yu, F., Yin, S., Zhang, R., and Tang, X.: Characterization of PM<sub>10</sub> and PM<sub>2.5</sub> Source Profiles of Fugitive Dust in Zhengzhou, China, *Aerosol Air Qual. Res.*, 18, 314-329, <https://doi.org/10.4209/aaqr.2017.04.0132>, 2018a.
- Jiang, N., Wang, K., Yu, X., Su, F., Yin, S., Li, Q., and Zhang, R.: Chemical characteristics and source apportionment by two receptor models of size-segregated aerosols in an emerging megacity in China, *Aerosol Air Qual. Res.*, 18, 1375-1390, <https://doi.org/10.4209/aaqr.2017.10.0413>, 2018b.
- Jiang, N., Liu, X., Wang, S., Yu, X., Yin, S., Duan, S., Shenbo, W., Zhang, R., and Li, S.: Pollution characterization, source identification, and health risks of atmospheric-particle-bound heavy metals in PM<sub>10</sub> and PM<sub>2.5</sub> at multiple sites in an emerging megacity in the Central Region of China, *Aerosol Air Qual. Res.*, 19, 247-271, <https://doi.org/10.4209/aaqr.2018.07.0275>, 2019.
- Kim, D.-R., Lee, J.-B., Keun Song, C., Kim, S.-Y., Ma, Y.-I., Lee, K.-M., Cha, J.-S., and Lee, S.-D.: Temporal and spatial distribution of tropospheric NO<sub>2</sub> over Northeast Asia using OMI data during the years 2005-2010, *Atmos. Pollut. Res.*,



- 
- 6, 768-776, <https://doi.org/10.5094/apr.2015.085>, 2015.
- Kleffmann, J., Becker, K. H., Lackhoff, M., and Wiesen, P.: Heterogeneous conversion of NO<sub>2</sub> on carbonaceous surfaces, *PCCP*, 1, 5443-5450, <https://doi.org/10.1039/a905545b>, 1999.
- Kurtenbach, R., Becker, K. H., Gomes, J. A. G., Kleffmann, J., Lorzer, J. C., Spittler, M., Wiesen, P., Ackermann, R., Geyer, A., and Platt, U.: Investigations of emissions and heterogeneous formation of HONO in a road traffic tunnel, *Atmos. Environ.*, 35, 3385-3394, [https://doi.org/10.1016/s1352-2310\(01\)00138-8](https://doi.org/10.1016/s1352-2310(01)00138-8), 2001.
- Lelieveld, J., Gromov, S., Pozzer, A., and Taraborrelli, D.: Global tropospheric hydroxyl distribution, budget and reactivity, *Atmos. Chem. Phys.*, 16, 12477-12493, <https://doi.org/10.5194/acp-16-12477-2016>, 2016.
- Li, Q., Jiang, N., Yu, X., Dong, Z., Duan, S., Zhang, L., and Zhang, R.: Sources and spatial distribution of PM<sub>2.5</sub>-bound polycyclic aromatic hydrocarbons in Zhengzhou in 2016, *Atmos. Res.*, 216, 65–75, <https://doi.org/10.1016/j.atmosres.2018.09.011>, 2019.
- Li, X., Brauers, T., Häsel, R., Bohn, B., Fuchs, H., Hofzumahaus, A., Holland, F., Lou, S., Lu, K. D., Rohrer, F., Hu, M., Zeng, L. M., Zhang, Y. H., Garland, R. M., Su, H., Nowak, A., Wiedensohler, A., Takegawa, N., Shao, M., and Wahner, A.: Exploring the atmospheric chemistry of nitrous acid (HONO) at a rural site in Southern China, *Atmos. Chem. Phys.*, 12, 1497-1513, <https://doi.org/10.5194/acp-12-1497-2012>, 2012.
- Liu, F., Beirle, S., Zhang, Q., van der A. R., Zheng, B., Tong, D., and He, K.: NO<sub>x</sub> emission trends over Chinese cities estimated from OMI observations during 2005 to 2015, *Atmos Chem Phys*, 17, 9261-9275, <https://doi.org/10.5194/acp-17-9261-2017>, 2017.
- Liu, X., Jiang, N., Yu, X., Zhang, R., Li, S., Li, Q., and Kang, P.: Chemical characteristics, sources apportionment, and risk assessment of PM<sub>2.5</sub> in different functional areas of an emerging megacity in China, *Aerosol Air Qual. Res.*, 19, 2222-2238, <https://doi.org/10.4209/aaqr.2019.02.0076>, 2019.
- Liu, Z., Wang, Y., Costabile, F., Amoroso, A., Zhao, C., Huey, L. G., Stickel, R., Liao, J., and Zhu, T.: Evidence of aerosols as a media for rapid daytime HONO production over China, *Environ. Sci. Technol.*, 48, 14386-14391, <https://doi.org/10.1021/es504163z>, 2014.
- Lu, X., Wang, Y., Li, J., Shen, L., and Fung, J. C. H.: Evidence of heterogeneous HONO formation from aerosols and the regional photochemical impact of this HONO source, *Environ. Res. Lett.*, 13, <https://doi.org/10.1088/1748-9326/aae492>, 2018.
- Nie, W., Ding, A. J., Xie, Y. N., Xu, Z., Mao, H., Kerminen, V. M., Zheng, L. F., Qi, X. M., Huang, X., Yang, X. Q., Sun, J. N., Herrmann, E., Petäjä, T., Kulmala, M., and Fu, C. B.: Influence of biomass burning plumes on HONO chemistry in eastern China, *Atmos. Chem. Phys.*, 15, 1147-1159, <https://doi.org/10.5194/acp->

- 
- 15-1147-2015, 2015.
- Sander, S., Friedl, R., Golden, D., Kurylo, M., Huie, R., Orkin, V., Moortgat, G., Ravishankara, A. R., Kolb, C., Molina, M., and Finlayson-Pitts, B.: Chemical Kinetics and Photochemical Data for Use in Atmospheric Studies; JPL Publication 02-25, 2003.
- Shen, L. J., and Zhang, Z. F.: Heterogeneous reactions of NO<sub>2</sub> on the surface of black carbon, *Prog. Chem.*, 25, 28-35, 2013.
- Su, H., Cheng, Y. F., Cheng, P., Zhang, Y. H., Dong, S., Zeng, L. M., Wang, X., Slanina, J., Shao, M., and Wiedensohler, A.: Observation of nighttime nitrous acid (HONO) formation at a non-urban site during PRIDE-PRD2004 in China, *Atmos. Environ.*, 42, 6219-6232, <https://doi.org/10.1016/j.atmosenv.2008.04.006>, 2008.
- Tan, Z., Rohrer, F., Lu, K., Ma, X., Bohn, B., Broch, S., Dong, H., Fuchs, H., Gkatzelis, G. I., Hofzumahaus, A., Holland, F., Li, X., Liu, Y., Liu, Y., Novelli, A., Shao, M., Wang, H., Wu, Y., Zeng, L., Hu, M., Kiendler-Scharr, A., Wahner, A., and Zhang, Y.: Wintertime photochemistry in Beijing: observations of RO<sub>x</sub> radical concentrations in the North China Plain during the BEST-ONE campaign, *Atmos. Chem. Phys.*, 18, 12391-12411, <https://doi.org/10.5194/acp-18-12391-2018>, 2018.
- Tong, S., Hou, S., Zhang, Y., Chu, B., Liu, Y., He, H., Zhao, P., and Ge, M.: Comparisons of measured nitrous acid (HONO) concentrations in a pollution period at urban and suburban Beijing, in autumn of 2014, *Sci. China Chem.*, 58, 1393-1402, <https://doi.org/10.1007/s11426-015-5454-2>, 2015.
- Tong, S., Hou, S., Zhang, Y., Chu, B., Liu, Y., He, H., Zhao, P., and Ge, M.: Exploring the nitrous acid (HONO) formation mechanism in winter Beijing: direct emissions and heterogeneous production in urban and suburban areas, *Faraday Discuss.*, 189, 213-230, <https://doi.org/10.1039/c5fd00163c>, 2016.
- VandenBoer, T. C., Markovic, M. Z., Sanders, J. E., Ren, X., Pusede, S. E., Browne, E. C., Cohen, R. C., Zhang, L., Thomas, J., Brune, W. H., and Murphy, J. G.: Evidence for a nitrous acid (HONO) reservoir at the ground surface in Bakersfield, CA, during CalNex 2010, *J. Geophys. Res.-Atmos.*, 119, 9093-9106, <https://doi.org/10.1002/2013jd020971>, 2014.
- Zhang, B., and Tao, F.-M.: Direct homogeneous nucleation of NO<sub>2</sub>, H<sub>2</sub>O, and NH<sub>3</sub> for the production of ammonium nitrate particles and HONO gas, *Chem. Phys. Lett.*, 489, 143-147, <https://doi.org/10.1016/j.cplett.2010.02.059>, 2010.
- Zhang, W., Tong, S., Ge, M., An, J., Shi, Z., Hou, S., Xia, K., Qu, Y., Zhang, H., Chu, B., Sun, Y., and He, H.: Variations and sources of nitrous acid (HONO) during a severe pollution episode in Beijing in winter 2016, *Sci. Total Environ.*, 648, 253-262, <https://doi.org/10.1016/j.scitotenv.2018.08.133>, 2019.

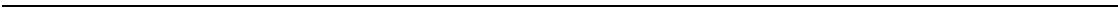

Supplement: Supplementary file [file acp-2019-916-AC1-supplement.pdf]
