# Supplementary material for: Characteristics, sources and reactions of nitrous acid during winter in the core city of the Central Plains Economic Region in China via high-time-resolution online measurements
Source: Copernicus journal article supplement (doi:10.5194/acp-2019-916), 2019-10-29
Supplement: Supplementary file 1 [file acp-2019-916-supplement.pdf]

## Figure Captions:

Fig. S1. The conversion process of gas samples from the atmospheric environment.

Fig. S2. The process of gas dissolution in the denuder.

Fig. S3. Diurnal variations of HONO during the measurement.

Fig. S4. The correlation study between  $\text{HONO}_{\text{correct}}$  and  $\text{NO}_2$  in the nighttime.

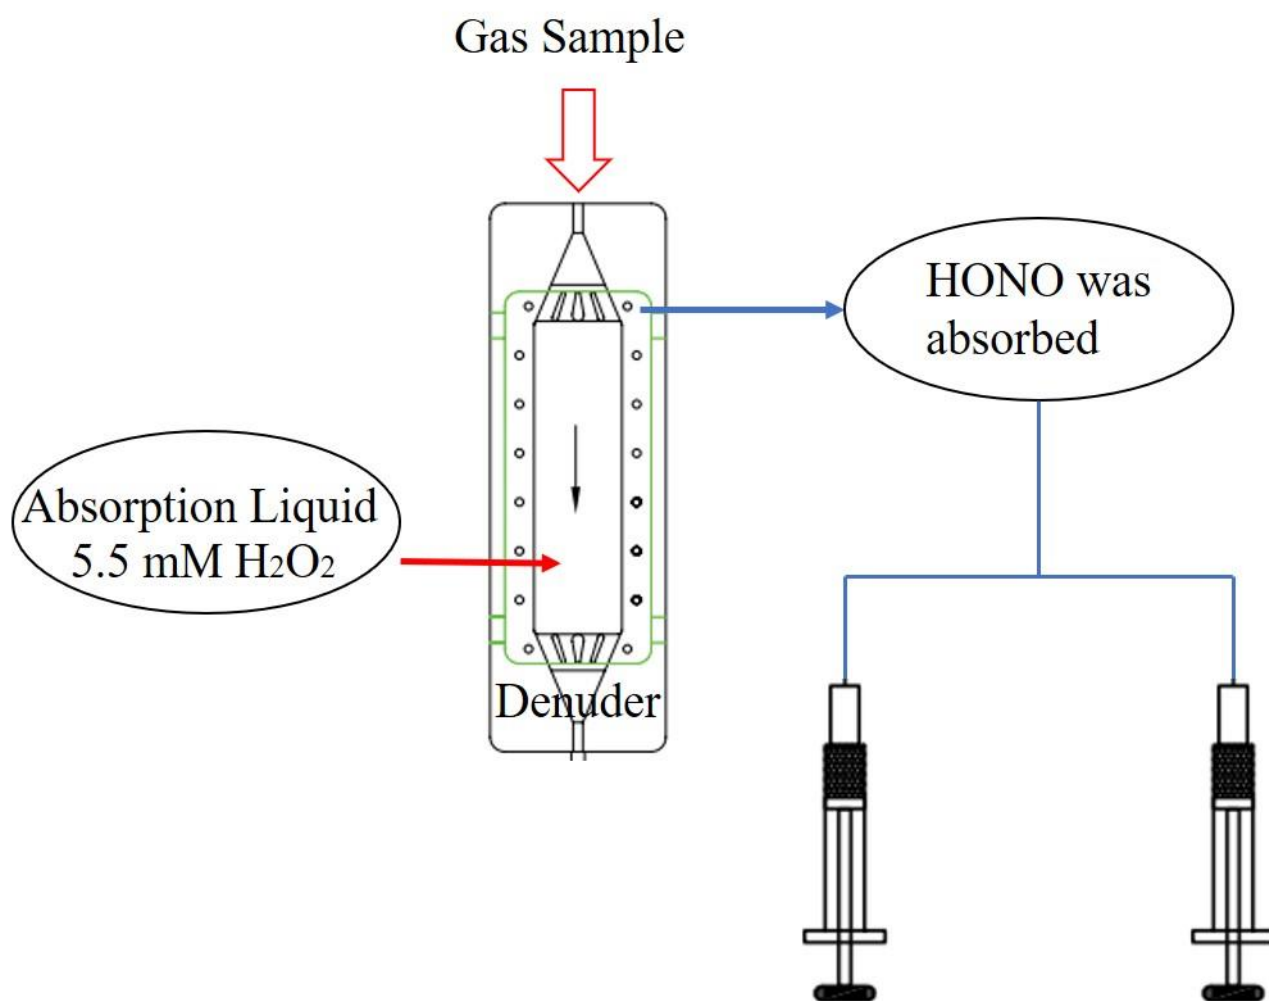

**Fig. S1.** The conversion process of gas samples from the atmospheric environment.

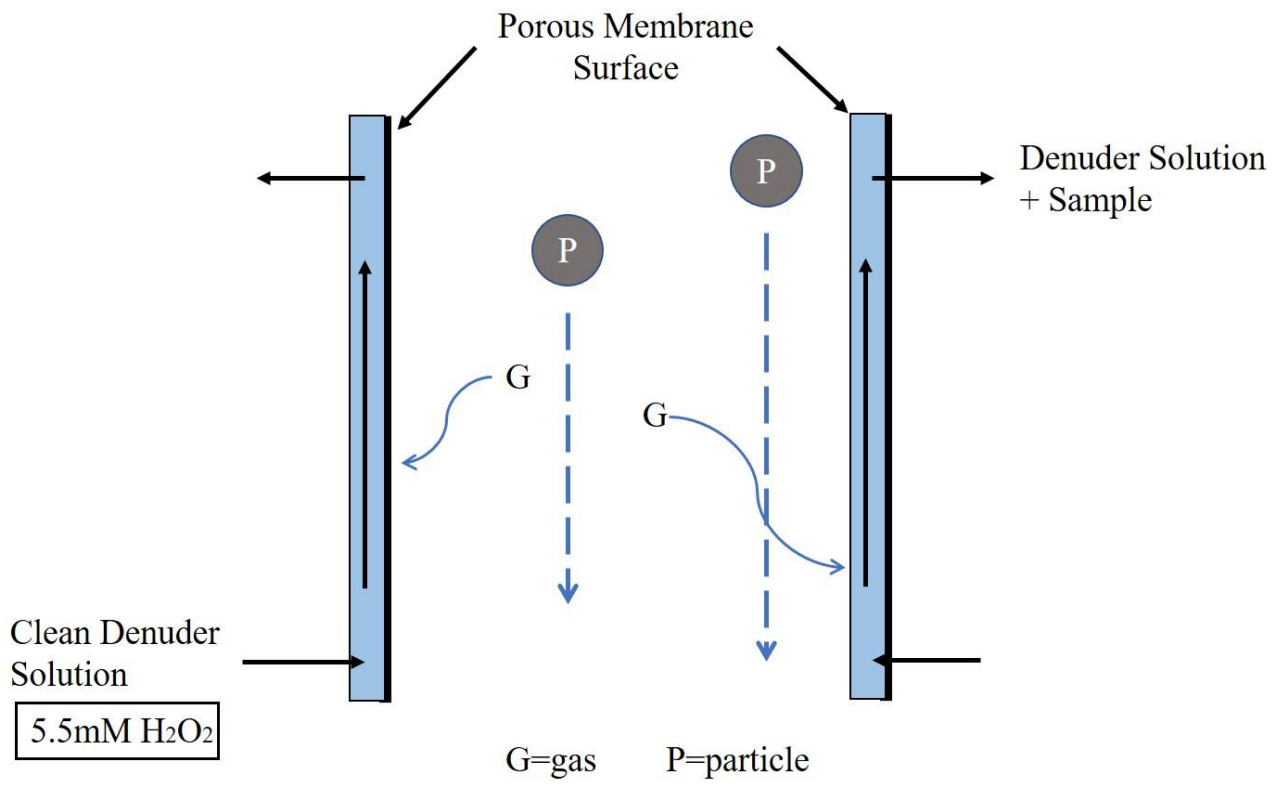

**Fig. S2.** The process of gas dissolution in the denuder.

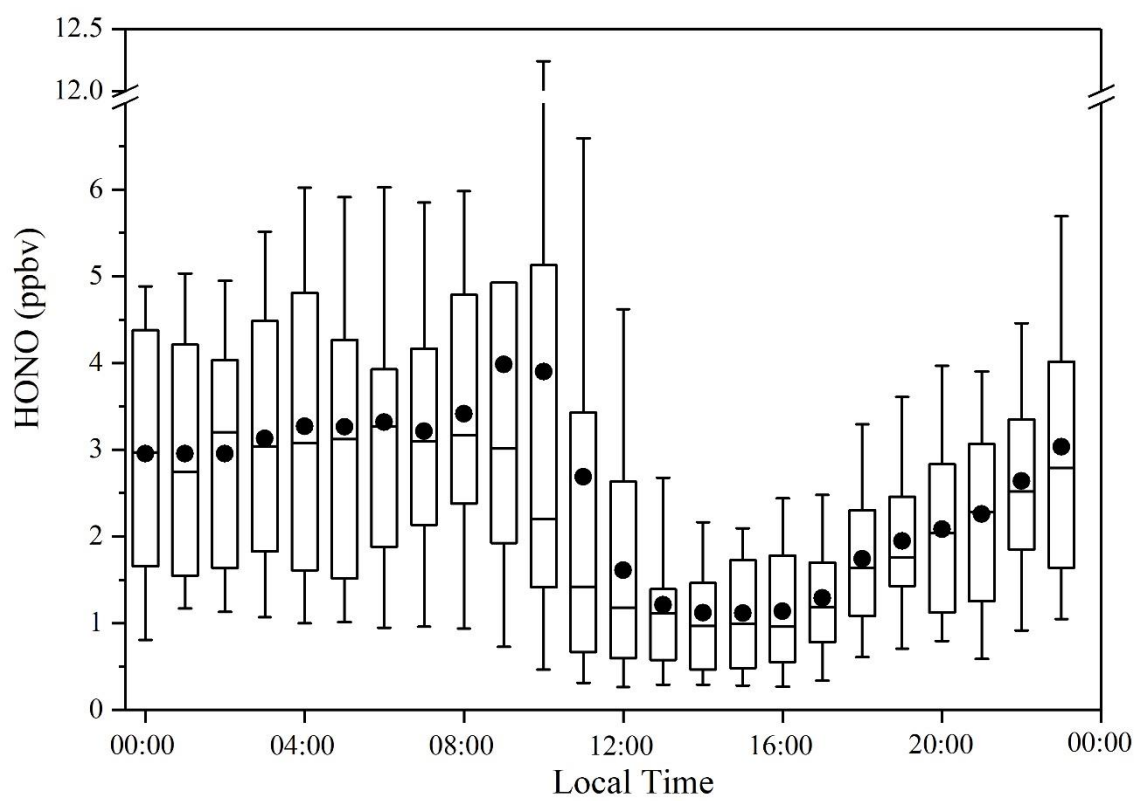

Fig. S3. Diurnal variations of HONO during the measurement.

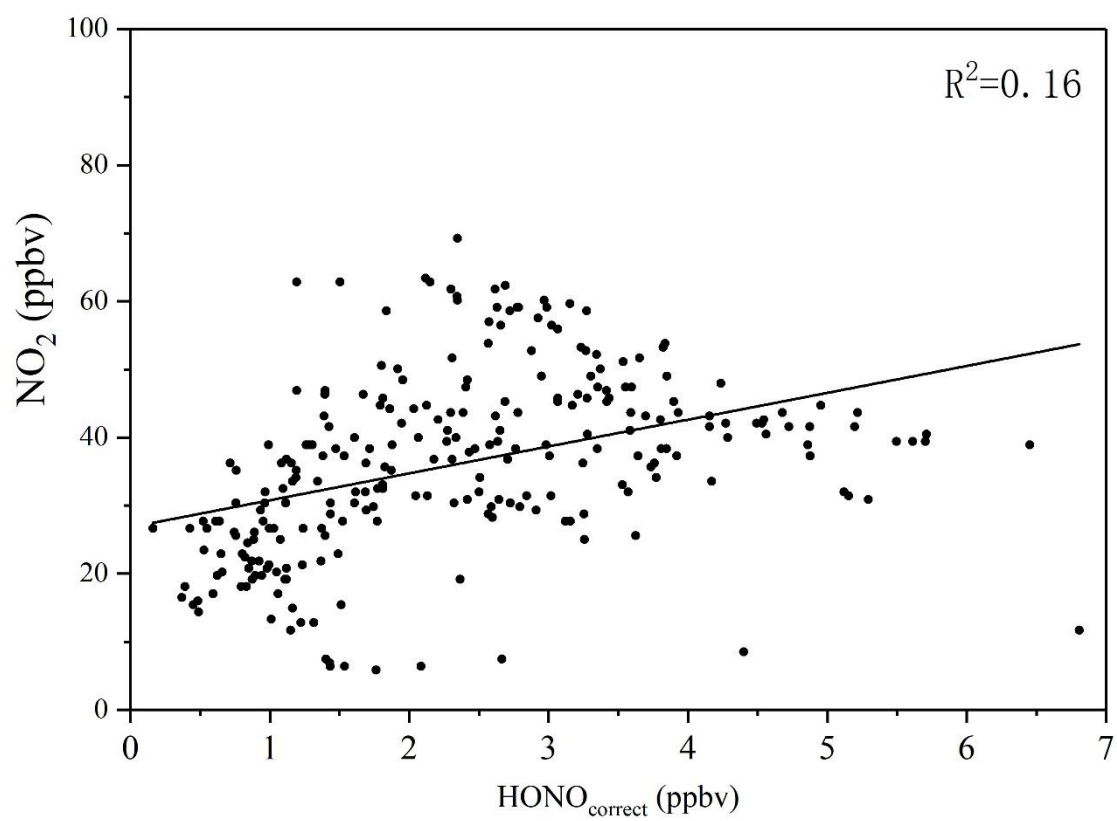

**Fig. S4.** The correlation study between HONO<sub>correct</sub> and NO<sub>2</sub> in the nighttime.
